# Supplementary material for: Terrestrial Ecosystem Model in R (TEMIR) version 1.0: simulating ecophysiological responses of vegetation to atmospheric chemical and meteorological changes
Source: Copernicus journal article supplement (doi:10.5194/gmd-17-3733-2024), 2024-05-08
Supplement: Supplementary file 1 [file gmd-17-3733-2024-supplement.pdf]

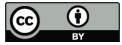

*Supplement of*

**Terrestrial Ecosystem Model in R (TEMIR) version 1.0: simulating ecophysiological responses of vegetation to atmospheric chemical and meteorological changes**

**Amos P. K. Tai et al.**

*Correspondence to:* Amos P. K. Tai ([amostai@cuhk.edu.hk](mailto:amostai@cuhk.edu.hk))

The copyright of individual parts of the supplement might differ from the article licence.

**Supplementary materials of manuscript “Terrestrial Ecosystem Model in R version 1.0: Simulating ecophysiological responses of vegetation to atmospheric chemical and meteorological changes” authored by Tai, A. P. K., Yung, D. H. Y., and Lam, T.**

Table S1: Bare land and plant functional type (PFT) classification, identification and matching between the PFTs used in the Community Land Model version 4.5 (CLM4.5) and International Geosphere Biosphere Program Data and Information System (IGBP-DIS) DISCover land cover dataset.

| <b>CLM PFT</b>                        | <b>IGBP-DIS PFT</b>         | <b>IGBP-DIS PFT Abbreviation</b> |
|---------------------------------------|-----------------------------|----------------------------------|
| Bare land                             | <i>Not classified</i>       | <i>Not classified</i>            |
| Needleleaf evergreen tree – temperate | Evergreen Needleleaf Forest | ENF                              |
| Needleleaf evergreen tree - boreal    | Evergreen Needleleaf Forest | ENF                              |
| Needleleaf deciduous tree – boreal    | <i>Not classified</i>       | <i>Not classified</i>            |
| Broadleaf evergreen tree – tropical   | Evergreen Broadleaf Forest  | EBF                              |
| Broadleaf evergreen tree – temperate  | Evergreen Broadleaf Forest  | EBF                              |
| Broadleaf deciduous tree – tropical   | Deciduous Broadleaf Forest  | DBF                              |
| Broadleaf deciduous tree – temperate  | Deciduous Broadleaf Forest  | DBF                              |
| Broadleaf deciduous tree – boreal     | Deciduous Broadleaf Forest  | DBF                              |
| Broadleaf evergreen shrub - temperate | <i>Not classified</i>       | <i>Not classified</i>            |
| Broadleaf deciduous shrub – temperate | Open Shrubland              | OSH                              |
| Broadleaf deciduous shrub – boreal    | Closed Shrubland            | CSH                              |
| C3 arctic grass                       | Grassland                   | GRA                              |
| C3 grass                              | Grassland                   | GRA                              |
| C4 grass                              | Grassland                   | GRA                              |
| C3 Unmanaged Rainfed Crop             | Cropland                    | CRO                              |
| C3 Unmanaged Irrigated Crop           | Cropland                    | CRO                              |
| Rainfed Corn                          | -                           | -                                |
| Irrigated Corn                        | -                           | -                                |
| Rainfed Temperate Cereals             | -                           | -                                |
| Irrigated Temperate Cereals           | -                           | -                                |
| Rainfed Winter Cereals                | -                           | -                                |
| Irrigated Winter Cereals              | -                           | -                                |
| Rainfed Soybean                       | -                           | -                                |
| Irrigated Soybean                     | -                           | -                                |

Table S2: Selected plant functional type specific parameters:  $z_{top}$  and  $z_{bot}$  are respectively canopy height at top and bottom of the canopy,  $R_{z0m}$  and  $R_d$  are the ratios of momentum roughness length and displacement height to canopy top height, respectively,  $\psi_c$  and  $\psi_o$  are the soil water potential when stomata are fully closed or fully open respectively

| CLM PFT                               | $z_{top}$ (m) | $z_{bot}$ (m) | $R_{z0m}$ | $R_d$ | $\psi_c$ (mm) | $\psi_o$ (mm) |
|---------------------------------------|---------------|---------------|-----------|-------|---------------|---------------|
| Needleleaf evergreen tree – temperate | 17            | 8.5           | 0.055     | 0.67  | -255000       | -66000        |
| Needleleaf evergreen tree - boreal    | 17            | 8.5           | 0.055     | 0.67  | -255000       | -66000        |
| Needleleaf deciduous tree – boreal    | 14            | 7             | 0.055     | 0.67  | -255000       | -66000        |
| Broadleaf evergreen tree – tropical   | 35            | 1             | 0.075     | 0.67  | -255000       | -66000        |
| Broadleaf evergreen tree – temperate  | 35            | 1             | 0.075     | 0.67  | -224000       | -66000        |
| Broadleaf deciduous tree – tropical   | 18            | 10            | 0.055     | 0.67  | -224000       | -35000        |
| Broadleaf deciduous tree – temperate  | 20            | 11.5          | 0.055     | 0.67  | -224000       | -35000        |
| Broadleaf deciduous tree – boreal     | 20            | 11.5          | 0.055     | 0.67  | -428000       | -35000        |
| Broadleaf evergreen shrub - temperate | 0.5           | 0.1           | 0.12      | 0.68  | -428000       | -83000        |
| Broadleaf deciduous shrub – temperate | 0.5           | 0.1           | 0.12      | 0.68  | -428000       | -83000        |
| Broadleaf deciduous shrub – boreal    | 0.5           | 0.1           | 0.12      | 0.68  | -428000       | -83000        |
| C3 arctic grass                       | 0.5           | 0.01          | 0.12      | 0.68  | -275000       | -74000        |
| C3 grass                              | 0.5           | 0.01          | 0.12      | 0.68  | -275000       | -74000        |
| C4 grass                              | 0.5           | 0.01          | 0.12      | 0.68  | -275000       | -74000        |
| C3 Unmanaged Rainfed Crop             | 0.5           | 0.01          | 0.12      | 0.68  | -275000       | -74000        |
| C3 Unmanaged Irrigated Crop           | 0.5           | 0.01          | 0.12      | 0.68  | -275000       | -74000        |
| Rainfed Corn                          | -             | -             | 0.12      | 0.68  | -275000       | -74000        |
| Irrigated Corn                        | -             | -             | 0.12      | 0.68  | -275000       | -74000        |
| Rainfed Temperate Cereals             | -             | -             | 0.12      | 0.68  | -275000       | -74000        |
| Irrigated Temperate Cereals           | -             | -             | 0.12      | 0.68  | -275000       | -74000        |
| Rainfed Winter Cereals                | -             | -             | 0.12      | 0.68  | -275000       | -74000        |
| Irrigated Winter Cereals              | -             | -             | 0.12      | 0.68  | -275000       | -74000        |
| Rainfed Soybean                       | -             | -             | 0.12      | 0.68  | -275000       | -74000        |
| Irrigated Soybean                     | -             | -             | 0.12      | 0.68  | -275000       | -74000        |

Table S3: Information of FLUXNET sites relevant for our simulations and model-observation comparison.

| Site ID | Site Name                                            | Site Latitude | Site Longitude | IGBP-DIS PFT Code | Simulation Period          |                                 |
|---------|------------------------------------------------------|---------------|----------------|-------------------|----------------------------|---------------------------------|
|         |                                                      |               |                |                   | Diurnal Analysis (M- yyyy) | Seasonal Analysis (yyyy - yyyy) |
| AU-DaP  | Daly River Savanna                                   | -14.0633      | 131.3181       | GRA               | January - 2012             | 2009 - 2013                     |
| AU-DaS  | Daly River Cleared                                   | -14.1593      | 131.3881       | GRA               | January - 2012             | 2009 - 2013                     |
| AU-Dry  | Dry River                                            | -15.2588      | 132.3706       | GRA               | January - 2012             | 2009 - 2013                     |
| AU-How  | Howard Springs                                       | -12.4943      | 131.1523       | GRA               | January - 2012             | 2009 - 2013                     |
| AU-Stp  | Sturt Plains                                         | -17.1507      | 133.3502       | GRA               | January - 2012             | 2009 - 2013                     |
| AU-Tum  | Tumbarumba                                           | -35.6566      | 148.1517       | EBF               | January - 2012             | 2009 - 2013                     |
| BE-Lon  | Lonze                                                | 50.5516       | 4.7461         | CRO               | July - 2012                | 2009 - 2013                     |
| CA-TP1  | Ontario - Turkey Point 2002 Plantation<br>White Pine | 42.6609       | -80.5595       | ENF               | July - 2012                | 2009 - 2013                     |
| CA-TP3  | Ontario - Turkey Point 1974 Plantation<br>White Pine | 42.7068       | -80.3483       | ENF               | July - 2012                | 2009 - 2013                     |
| CA-TP4  | Ontario - Turkey Point 1939 Plantation<br>White Pine | 42.7102       | -80.3574       | ENF               | July - 2012                | 2009 - 2013                     |
| CH-Cha  | Chamau                                               | 47.2102       | 8.4104         | GRA               | July - 2012                | 2009 - 2013                     |
| CH-Dav  | Davos- Seehorn forest                                | 46.8153       | 9.8559         | ENF               | July - 2012                | 2009 - 2013                     |
| CH-Fru  | Früebüel                                             | 47.1158       | 8.5378         | GRA               | July - 2012                | 2009 - 2013                     |
| CH-Oe2  | Oensingen2 crop                                      | 47.2863       | 7.7343         | CRO               | July - 2012                | 2009 - 2013                     |
| CZ-wet  | CZECHWET                                             | 49.0247       | 14.7704        | GRA               | July - 2012                | 2009 - 2013                     |
| DE-Akm  | Anklam                                               | 53.8662       | 13.6834        | GRA               | July - 2012                | 2009 - 2013                     |



Table S2: Selected plant functional type specific parameters:  $z_{\text{top}}$  and  $z_{\text{bot}}$  are respectively canopy height at top and bottom of the canopy,  $R_{z0m}$  and  $R_d$  are the ratios of momentum roughness length and displacement height to canopy top height, respectively,  $\psi_c$  and  $\psi_o$  are the soil water potential when stomata are fully closed or fully open respectively

| CLM PFT                               | $z_{\text{top}}$ (m) | $z_{\text{bot}}$ (m) | $R_{z0m}$ | $R_d$ | $\psi_c$ (mm) | $\psi_o$ (mm) |
|---------------------------------------|----------------------|----------------------|-----------|-------|---------------|---------------|
| Needleleaf evergreen tree – temperate | 17                   | 8.5                  | 0.055     | 0.67  | -255000       | -66000        |
| Needleleaf evergreen tree - boreal    | 17                   | 8.5                  | 0.055     | 0.67  | -255000       | -66000        |
| Needleleaf deciduous tree – boreal    | 14                   | 7                    | 0.055     | 0.67  | -255000       | -66000        |
| Broadleaf evergreen tree – tropical   | 35                   | 1                    | 0.075     | 0.67  | -255000       | -66000        |
| Broadleaf evergreen tree – temperate  | 35                   | 1                    | 0.075     | 0.67  | -224000       | -66000        |
| Broadleaf deciduous tree – tropical   | 18                   | 10                   | 0.055     | 0.67  | -224000       | -35000        |
| Broadleaf deciduous tree – temperate  | 20                   | 11.5                 | 0.055     | 0.67  | -224000       | -35000        |
| Broadleaf deciduous tree – boreal     | 20                   | 11.5                 | 0.055     | 0.67  | -428000       | -35000        |
| Broadleaf evergreen shrub - temperate | 0.5                  | 0.1                  | 0.12      | 0.68  | -428000       | -83000        |
| Broadleaf deciduous shrub – temperate | 0.5                  | 0.1                  | 0.12      | 0.68  | -428000       | -83000        |
| Broadleaf deciduous shrub – boreal    | 0.5                  | 0.1                  | 0.12      | 0.68  | -428000       | -83000        |
| C3 arctic grass                       | 0.5                  | 0.01                 | 0.12      | 0.68  | -275000       | -74000        |
| C3 grass                              | 0.5                  | 0.01                 | 0.12      | 0.68  | -275000       | -74000        |
| C4 grass                              | 0.5                  | 0.01                 | 0.12      | 0.68  | -275000       | -74000        |
| C3 Unmanaged Rainfed Crop             | 0.5                  | 0.01                 | 0.12      | 0.68  | -275000       | -74000        |
| C3 Unmanaged Irrigated Crop           | 0.5                  | 0.01                 | 0.12      | 0.68  | -275000       | -74000        |
| Rainfed Corn                          | -                    | -                    | 0.12      | 0.68  | -275000       | -74000        |
| Irrigated Corn                        | -                    | -                    | 0.12      | 0.68  | -275000       | -74000        |
| Rainfed Temperate Cereals             | -                    | -                    | 0.12      | 0.68  | -275000       | -74000        |
| Irrigated Temperate Cereals           | -                    | -                    | 0.12      | 0.68  | -275000       | -74000        |
| Rainfed Winter Cereals                | -                    | -                    | 0.12      | 0.68  | -275000       | -74000        |
| Irrigated Winter Cereals              | -                    | -                    | 0.12      | 0.68  | -275000       | -74000        |
| Rainfed Soybean                       | -                    | -                    | 0.12      | 0.68  | -275000       | -74000        |
| Irrigated Soybean                     | -                    | -                    | 0.12      | 0.68  | -275000       | -74000        |

Table S3 Cont.

| Site ID | Site Name               | Site Latitude | Site Longitude | IGBP-DIS PFT Code | Simulation Period          |                                |
|---------|-------------------------|---------------|----------------|-------------------|----------------------------|--------------------------------|
|         |                         |               |                |                   | Diurnal Analysis (M- yyyy) | Seasonal Analysis (yyyy- yyyy) |
| DE-Geb  | Gebese                  | 51.1001       | 10.9143        | CRO               | July – 2012                | 2009 – 2013                    |
| DE-Gri  | Grillenburg             | 50.9495       | 13.5125        | GRA               | July – 2012                | 2009 – 2013                    |
| DE-Hai  | Hainich                 | 51.0792       | 10.453         | DBF               | July – 2012                | 2009 – 2013                    |
| DE-Kli  | Klingenberg             | 50.8929       | 13.5225        | CRO               | July – 2012                | 2009 – 2013                    |
| DE-Lkb  | Lackenberg              | 49.0996       | 13.3047        | ENF               | July – 2012                | 2009 – 2013                    |
| DE-Obe  | Oberbärenburg           | 50.7836       | 13.7196        | ENF               | July – 2012                | 2009 – 2013                    |
| DE-Tha  | Tharandt                | 50.9636       | 13.5669        | ENF               | July – 2012                | 2009 – 2013                    |
| DK-NuF  | Nuuk Fen                | 64.1308       | -51.3861       | GRA               | July – 2012                | 2009 – 2013                    |
| DK-Sor  | Soroe                   | 55.4859       | 11.6446        | DBF               | July – 2012                | 2009 – 2013                    |
| ES-LJu  | Llano de los Juanes     | 36.9266       | -2.7521        | OSH               | July – 2012                | 2009 – 2013                    |
| FI-Hyy  | Hyytiala                | 61.8475       | 24.295         | ENF               | July – 2012                | 2009 – 2013                    |
| FI-Sod  | Sodankyla               | 67.3619       | 26.6378        | ENF               | July – 2012                | 2009 – 2013                    |
| FR-Fon  | Fontainebleau-Barbeau   | 48.4764       | 2.7801         | DBF               | July – 2012                | 2009 – 2013                    |
| FR-Gri  | Grignon                 | 48.8442       | 1.9519         | CRO               | July – 2012                | 2009 – 2013                    |
| IT-BCi  | Borgo Cioffi            | 40.5238       | 14.9574        | CRO               | July – 2012                | 2009 – 2013                    |
| IT-Col  | Collelongo- Selva Piana | 41.8494       | 13.5881        | DBF               | July – 2012                | 2009 – 2013                    |
| IT-Lav  | Lavarone                | 45.9562       | 11.2813        | ENF               | July – 2012                | 2009 – 2013                    |





Table S2: Selected plant functional type specific parameters:  $z_{\text{top}}$  and  $z_{\text{bot}}$  are respectively canopy height at top and bottom of the canopy,  $R_{z0m}$  and  $R_d$  are the ratios of momentum roughness length and displacement height to canopy top height, respectively,  $\psi_c$  and  $\psi_o$  are the soil water potential when stomata are fully closed or fully open respectively

| CLM PFT                               | $z_{\text{top}}$ (m) | $z_{\text{bot}}$ (m) | $R_{z0m}$ | $R_d$ | $\psi_c$ (mm) | $\psi_o$ (mm) |
|---------------------------------------|----------------------|----------------------|-----------|-------|---------------|---------------|
| Needleleaf evergreen tree – temperate | 17                   | 8.5                  | 0.055     | 0.67  | -255000       | -66000        |
| Needleleaf evergreen tree - boreal    | 17                   | 8.5                  | 0.055     | 0.67  | -255000       | -66000        |
| Needleleaf deciduous tree – boreal    | 14                   | 7                    | 0.055     | 0.67  | -255000       | -66000        |
| Broadleaf evergreen tree – tropical   | 35                   | 1                    | 0.075     | 0.67  | -255000       | -66000        |
| Broadleaf evergreen tree – temperate  | 35                   | 1                    | 0.075     | 0.67  | -224000       | -66000        |
| Broadleaf deciduous tree – tropical   | 18                   | 10                   | 0.055     | 0.67  | -224000       | -35000        |
| Broadleaf deciduous tree – temperate  | 20                   | 11.5                 | 0.055     | 0.67  | -224000       | -35000        |
| Broadleaf deciduous tree – boreal     | 20                   | 11.5                 | 0.055     | 0.67  | -428000       | -35000        |
| Broadleaf evergreen shrub - temperate | 0.5                  | 0.1                  | 0.12      | 0.68  | -428000       | -83000        |
| Broadleaf deciduous shrub – temperate | 0.5                  | 0.1                  | 0.12      | 0.68  | -428000       | -83000        |
| Broadleaf deciduous shrub – boreal    | 0.5                  | 0.1                  | 0.12      | 0.68  | -428000       | -83000        |
| C3 arctic grass                       | 0.5                  | 0.01                 | 0.12      | 0.68  | -275000       | -74000        |
| C3 grass                              | 0.5                  | 0.01                 | 0.12      | 0.68  | -275000       | -74000        |
| C4 grass                              | 0.5                  | 0.01                 | 0.12      | 0.68  | -275000       | -74000        |
| C3 Unmanaged Rainfed Crop             | 0.5                  | 0.01                 | 0.12      | 0.68  | -275000       | -74000        |
| C3 Unmanaged Irrigated Crop           | 0.5                  | 0.01                 | 0.12      | 0.68  | -275000       | -74000        |
| Rainfed Corn                          | -                    | -                    | 0.12      | 0.68  | -275000       | -74000        |
| Irrigated Corn                        | -                    | -                    | 0.12      | 0.68  | -275000       | -74000        |
| Rainfed Temperate Cereals             | -                    | -                    | 0.12      | 0.68  | -275000       | -74000        |
| Irrigated Temperate Cereals           | -                    | -                    | 0.12      | 0.68  | -275000       | -74000        |
| Rainfed Winter Cereals                | -                    | -                    | 0.12      | 0.68  | -275000       | -74000        |
| Irrigated Winter Cereals              | -                    | -                    | 0.12      | 0.68  | -275000       | -74000        |
| Rainfed Soybean                       | -                    | -                    | 0.12      | 0.68  | -275000       | -74000        |
| Irrigated Soybean                     | -                    | -                    | 0.12      | 0.68  | -275000       | -74000        |

Table S3 Cont.

| Site ID | Site Name                                    | Site Latitude | Site Longitude | IGBP-DIS PFT Code | Simulation Period          |                                |
|---------|----------------------------------------------|---------------|----------------|-------------------|----------------------------|--------------------------------|
|         |                                              |               |                |                   | Diurnal Analysis (M- yyyy) | Seasonal Analysis (yyyy- yyyy) |
| IT-MBo  | Monte Bondone                                | 46.0147       | 11.0458        | GRA               | July - 2012                | 2009 - 2013                    |
| IT-Ren  | Renon                                        | 46.5869       | 11.4337        | ENF               | July - 2012                | 2009 - 2013                    |
| IT-Tor  | Torgnon                                      | 45.8444       | 7.5781         | GRA               | July - 2012                | 2009 - 2013                    |
| NL-Loo  | Loobos                                       | 52.1666       | 5.7436         | ENF               | July - 2012                | 2009 - 2013                    |
| RU-Fyo  | Fyodorovskoye                                | 56.4615       | 32.9221        | ENF               | July - 2012                | 2009 - 2013                    |
| RU-Sam  | Samoylov                                     | 72.3733       | 126.4978       | GRA               | July - 2012                | 2009 - 2013                    |
| US-Me2  | Metolius mature ponderosa pine               | 44.4523       | -121.5574      | ENF               | July - 2012                | 2009 - 2013                    |
| US-MMS  | Morgan Monroe State Forest                   | 39.3232       | -86.4131       | DBF               | July - 2012                | 2009 - 2013                    |
| US-Ne1  | Mead - irrigated continuous maize site       | 41.1651       | -96.4766       | CRO               | July - 2012                | 2009 - 2013                    |
| US-Ne2  | Mead - irrigated maize-soybean rotation site | 41.1649       | -96.4701       | CRO               | July - 2012                | 2009 - 2013                    |
| US-Ne3  | Mead - rainfed maize-soybean rotation site   | 41.1797       | -96.4397       | CRO               | July - 2012                | 2009 - 2013                    |
| US-NR1  | Niwot Ridge Forest (LTER NWT1)               | 40.0329       | -105.5464      | ENF               | July - 2012                | 2009 - 2013                    |
| US-Oho  | Oak Openings                                 | 41.5545       | -83.8438       | DBF               | July - 2012                | 2009 - 2013                    |
| US-SRG  | Santa Rita Grassland                         | 31.7894       | -110.8277      | GRA               | July - 2012                | 2009 - 2013                    |
| US-SRM  | Santa Rita Mesquite                          | 31.8214       | -110.8661      | GRA               | July - 2012                | 2009 - 2013                    |
| US-Twt  | Twitchell Island                             | 38.1087       | -121.653       | CRO               | July - 2012                | 2009 - 2013                    |
| US-UMB  | Univ. of Mich. Biological Station            | 45.5598       | -84.7138       | DBF               | July - 2012                | 2009 - 2013                    |

Table S4: Average normalized mean bias ( $N$ ) of monthly gross primary productivity (GPP) from comparison between FLUXNET GPP and TEMIR-simulated GPP using FLUXNET local meteorology of sites per plant functional type (PFT) described in Table S1.

| <b>CLM PFT</b>                        | <b>Average Normalized Mean Bias</b> | <b>Standard Deviation</b> |
|---------------------------------------|-------------------------------------|---------------------------|
| Bare land                             | <i>Not classified</i>               | <i>Not classified</i>     |
| Needleleaf evergreen tree – temperate | 0.1084                              | 0.2686                    |
| Needleleaf evergreen tree - boreal    | 0.0897                              | 0.19                      |
| Needleleaf deciduous tree – boreal    | <i>Not classified</i>               | <i>Not classified</i>     |
| Broadleaf evergreen tree – tropical   | -0.0332                             | 0.047                     |
| Broadleaf evergreen tree – temperate  | -0.2146                             | 0.3035                    |
| Broadleaf deciduous tree – tropical   | 0                                   | 0                         |
| Broadleaf deciduous tree – temperate  | -0.0737                             | 0.2175                    |
| Broadleaf deciduous tree – boreal     | -0.0209                             | 0.0579                    |
| Broadleaf evergreen shrub - temperate | <i>Not classified</i>               | <i>Not classified</i>     |
| Broadleaf deciduous shrub – temperate | 2.5864                              | 1.4176                    |
| Broadleaf deciduous shrub – boreal    | -                                   | -                         |
| C3 arctic grass                       | 0.1562                              | 0.4838                    |
| C3 grass                              | 0.2485                              | 0.5679                    |
| C4 grass                              | 0.6683                              | 1.0709                    |
| C3 Unmanaged Rainfed Crop             | -0.3267                             | 0.2816                    |
| C3 Unmanaged Irrigated Crop           | 0.0367                              | 0.1933                    |
| Rainfed Corn                          | -                                   | -                         |
| Irrigated Corn                        | -                                   | -                         |
| Rainfed Temperate Cereals             | -                                   | -                         |
| Irrigated Temperate Cereals           | -                                   | -                         |
| Rainfed Winter Cereals                | -                                   | -                         |
| Irrigated Winter Cereals              | -                                   | -                         |
| Rainfed Soybean                       | -                                   | -                         |

Table S5: MERRA-2 surface meteorological variables (“A1 fields”) used for gridded simulations of TEMIR.

| <b>Field</b> | <b>Standard name</b>                                      | <b>Unit</b>                      |
|--------------|-----------------------------------------------------------|----------------------------------|
| PARDR        | Incident direct beam photosynthetically active radiation  | $\text{W m}^{-2}$                |
| PARDF        | Incident diffuse photosynthetically active radiation      | $\text{W m}^{-2}$                |
| SWGDN        | Incoming shortwave radiation                              | $\text{W m}^{-2}$                |
| HFLUX        | Sensible heat flux                                        | $\text{W m}^{-2}$                |
| EFLUX        | Latent heat flux                                          | $\text{W m}^{-2}$                |
| EVAP         | Evapotranspiration flux                                   | $\text{kg m}^{-2} \text{s}^{-1}$ |
| USTAR        | Characteristic velocity scale or friction velocity        | $\text{m s}^{-1}$                |
| Z0M          | Surface roughness for momentum                            | m                                |
| SLP          | Sea-level pressure                                        | Pa                               |
| T2M          | Atmospheric temperature at 2 m above displacement height  | K                                |
| T10M         | Atmospheric temperature at 10 m above displacement height | K                                |
| QV2M         | Specific humidity at 2 m above displacement height        | $\text{kg kg}^{-1}$              |
| U10M         | Eastward wind speed at 10 m above displacement height     | $\text{m s}^{-1}$                |
| V10M         | Northward wind speed at 10 m above displacement height    | $\text{m s}^{-1}$                |
| PRECTOT      | Total precipitation                                       | $\text{kg m}^{-2} \text{s}^{-1}$ |
| PRECSNO      | Snowfall                                                  | $\text{kg m}^{-2} \text{s}^{-1}$ |
| SNODP        | Snow depth                                                | m                                |
| GWETROOT     | Soil wetness for root zone                                | 0 – 1                            |
| GWETTOP      | Soil wetness for top soil                                 | 0 – 1                            |
| CLDTOT       | Cloud fraction                                            | 0 – 1                            |

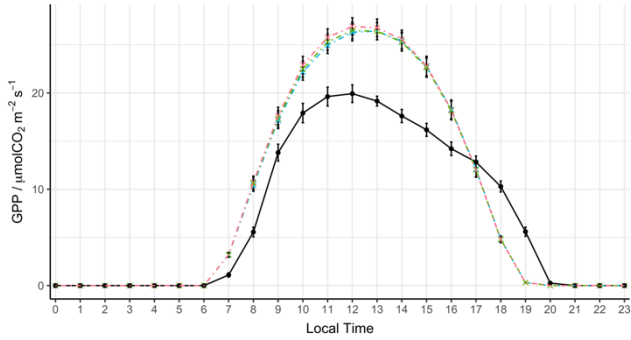

|               |                 |                   |              |      |           |       |   |
|---------------|-----------------|-------------------|--------------|------|-----------|-------|---|
| Site :        | AU-DaP          | GPP Output        |              |      | $R^2$ / % | B / % | N |
| PFT of Site : | GRA             | — GPP_DT_VUT_MEAN | TEMIR_FLUX   | 93.9 | 23.1      | 0.643 |   |
| Time Period : | January of 2012 | — TEMIR_FLUX      | TEMIR_MO_on  | 93.8 | 25        | 0.622 |   |
|               |                 | — TEMIR_MO_off    | TEMIR_MO_off | 93.9 | 23.5      | 0.637 |   |
|               |                 | — TEMIR_MO_on     |              |      |           |       |   |

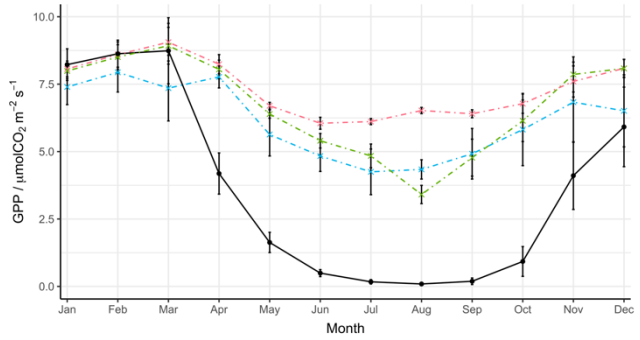

|               |             |                   |              |      |           |         |   |
|---------------|-------------|-------------------|--------------|------|-----------|---------|---|
| Site :        | AU-DaP      | GPP Output        |              |      | $R^2$ / % | B / %   | N |
| PFT of Site : | GRA         | — GPP_DT_VUT_MEAN | TEMIR_FLUX   | 78.9 | 69.9      | 0.00558 |   |
| Year Range :  | 2009 – 2013 | — TEMIR_FLUX      | TEMIR_MO_on  | 89   | 104       | -0.248  |   |
|               |             | — TEMIR_MO_off    | TEMIR_MO_off | 80.2 | 85.6      | -0.0409 |   |
|               |             | — TEMIR_MO_on     |              |      |           |         |   |

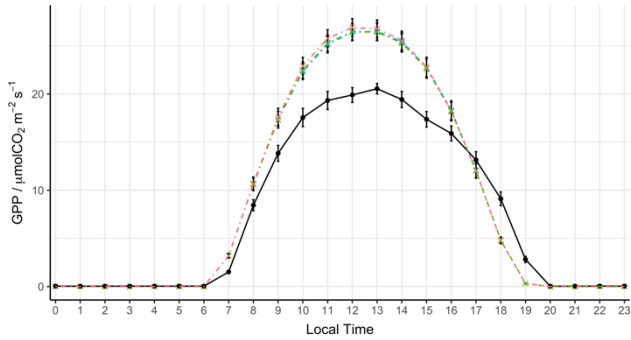

|               |                 |                   |              |      |           |       |   |
|---------------|-----------------|-------------------|--------------|------|-----------|-------|---|
| Site :        | AU-DaS          | GPP Output        |              |      | $R^2$ / % | B / % | N |
| PFT of Site : | GRA             | — GPP_DT_VUT_MEAN | TEMIR_FLUX   | 97.1 | 20        | 0.715 |   |
| Time Period : | January of 2012 | — TEMIR_FLUX      | TEMIR_MO_on  | 96.9 | 21.3      | 0.702 |   |
|               |                 | — TEMIR_MO_off    | TEMIR_MO_off | 97   | 19.9      | 0.716 |   |
|               |                 | — TEMIR_MO_on     |              |      |           |       |   |

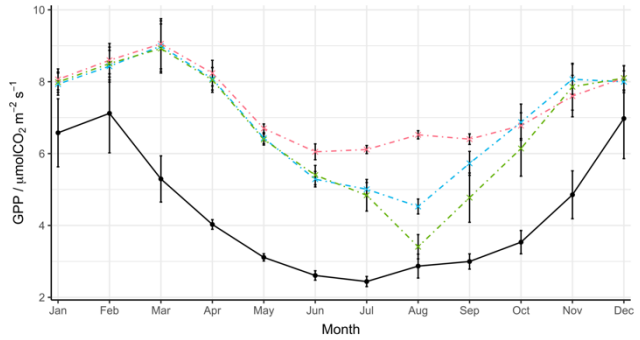

|               |             |                   |              |      |           |        |   |
|---------------|-------------|-------------------|--------------|------|-----------|--------|---|
| Site :        | AU-DaS      | GPP Output        |              |      | $R^2$ / % | B / %  | N |
| PFT of Site : | GRA         | — GPP_DT_VUT_MEAN | TEMIR_FLUX   | 66.5 | 59        | -0.722 |   |
| Year Range :  | 2009 – 2013 | — TEMIR_FLUX      | TEMIR_MO_on  | 70.8 | 68.3      | -0.993 |   |
|               |             | — TEMIR_MO_off    | TEMIR_MO_off | 66   | 53.4      | -0.557 |   |
|               |             | — TEMIR_MO_on     |              |      |           |        |   |

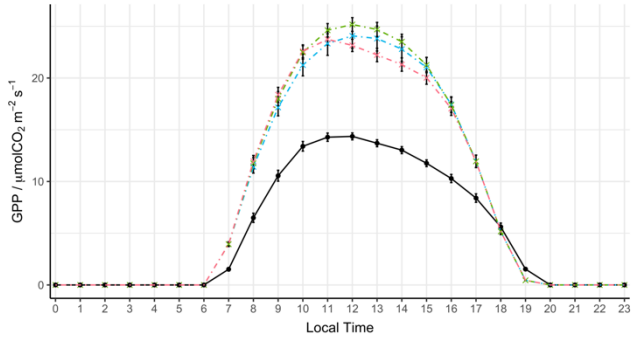

|               |                 |                   |              |      |           |       |   |
|---------------|-----------------|-------------------|--------------|------|-----------|-------|---|
| Site :        | AU-Dry          | GPP Output        |              |      | $R^2$ / % | B / % | N |
| PFT of Site : | GRA             | — GPP_DT_VUT_MEAN | TEMIR_FLUX   | 98.5 | 63.1      | 0.366 |   |
| Time Period : | January of 2012 | — TEMIR_FLUX      | TEMIR_MO_on  | 98.7 | 61.6      | 0.381 |   |
|               |                 | — TEMIR_MO_off    | TEMIR_MO_off | 98.5 | 68.4      | 0.315 |   |
|               |                 | — TEMIR_MO_on     |              |      |           |       |   |

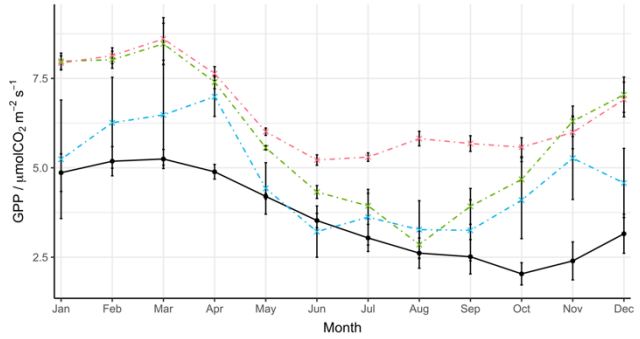

|               |             |                   |              |      |           |        |   |
|---------------|-------------|-------------------|--------------|------|-----------|--------|---|
| Site :        | AU-Dry      | GPP Output        |              |      | $R^2$ / % | B / %  | N |
| PFT of Site : | GRA         | — GPP_DT_VUT_MEAN | TEMIR_FLUX   | 55.4 | 29.8      | -0.102 |   |
| Year Range :  | 2009 – 2013 | — TEMIR_FLUX      | TEMIR_MO_on  | 70.3 | 80.5      | -1.84  |   |
|               |             | — TEMIR_MO_off    | TEMIR_MO_off | 59.8 | 61.4      | -1.17  |   |
|               |             | — TEMIR_MO_on     |              |      |           |        |   |

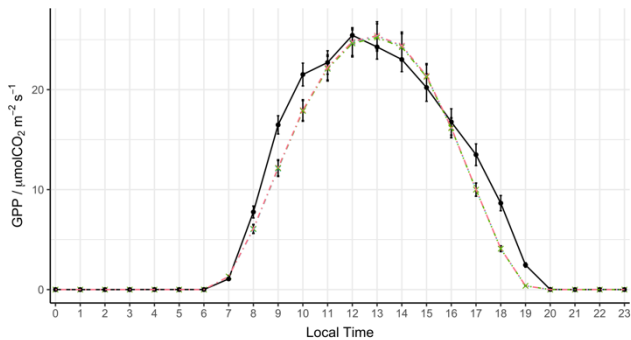

|               |                 |                   |              |      |           |       |   |
|---------------|-----------------|-------------------|--------------|------|-----------|-------|---|
| Site :        | AU-How          | GPP Output        |              |      | $R^2$ / % | B / % | N |
| PFT of Site : | GRA             | — GPP_DT_VUT_MEAN | TEMIR_FLUX   | 97.2 | -8.79     | 0.881 |   |
| Time Period : | January of 2012 | — TEMIR_FLUX      | TEMIR_MO_on  | 97.2 | -8.56     | 0.882 |   |
|               |                 | — TEMIR_MO_off    | TEMIR_MO_off | 97.3 | -9.04     | 0.882 |   |
|               |                 | — TEMIR_MO_on     |              |      |           |       |   |

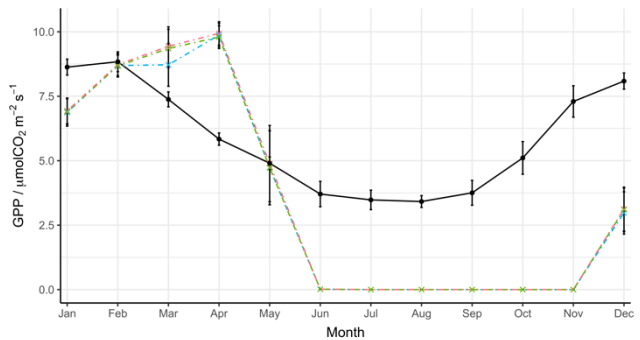

|               |             |                   |              |      |           |        |   |
|---------------|-------------|-------------------|--------------|------|-----------|--------|---|
| Site :        | AU-How      | GPP Output        |              |      | $R^2$ / % | B / %  | N |
| PFT of Site : | GRA         | — GPP_DT_VUT_MEAN | TEMIR_FLUX   | 40.8 | -40.6     | -0.807 |   |
| Year Range :  | 2009 – 2013 | — TEMIR_FLUX      | TEMIR_MO_on  | 40.7 | -38.9     | -0.824 |   |
|               |             | — TEMIR_MO_off    | TEMIR_MO_off | 41.1 | -39.6     | -0.826 |   |
|               |             | — TEMIR_MO_on     |              |      |           |        |   |

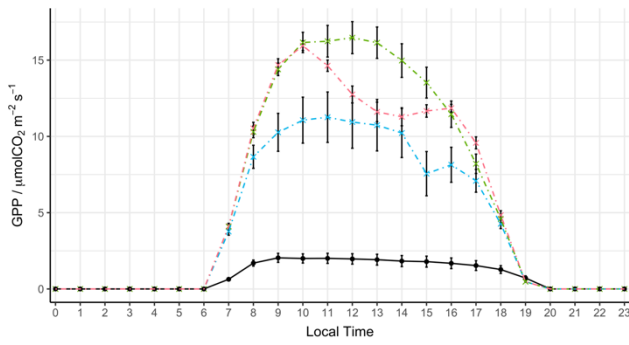

Site: AU-Stp  
PFT of Site: GRA  
Time Period: January of 2012

| GPP Output |                 | $R^2$ / %    | B / % | N   |       |
|------------|-----------------|--------------|-------|-----|-------|
| —          | GPP_DT_VUT_MEAN | TEMIR_FLUX   | 95.7  | 395 | -3.16 |
| - - -      | TEMIR_FLUX      | TEMIR_MO_on  | 95.1  | 535 | -4.63 |
| - - -      | TEMIR_MO_off    | TEMIR_MO_off | 93.4  | 597 | -5.28 |
| - - -      | TEMIR_MO_on     |              |       |     |       |

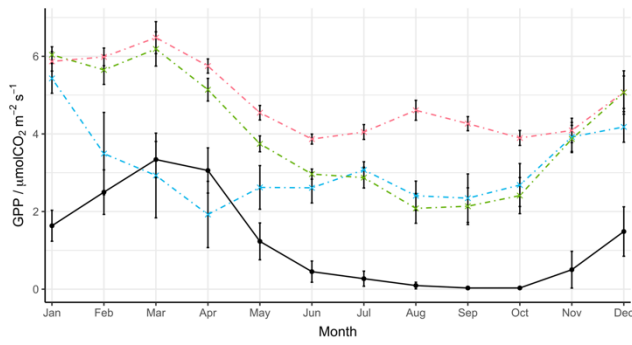

Site: AU-Stp  
PFT of Site: GRA  
Year Range: 2009 - 2013

| GPP Output |                 | $R^2$ / %    | B / % | N   |       |
|------------|-----------------|--------------|-------|-----|-------|
| —          | GPP_DT_VUT_MEAN | TEMIR_FLUX   | 0.881 | 157 | -1.2  |
| - - -      | TEMIR_FLUX      | TEMIR_MO_on  | 84    | 300 | -2.69 |
| - - -      | TEMIR_MO_off    | TEMIR_MO_off | 79.7  | 229 | -1.83 |
| - - -      | TEMIR_MO_on     |              |       |     |       |

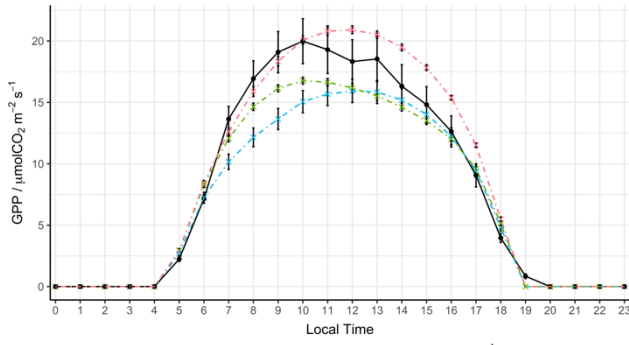

Site: AU-Tum  
PFT of Site: EBF  
Time Period: January of 2012

| GPP Output |                 | $R^2$ / %    | B / % | N     |       |
|------------|-----------------|--------------|-------|-------|-------|
| —          | GPP_DT_VUT_MEAN | TEMIR_FLUX   | 97.2  | -14.9 | 0.821 |
| - - -      | TEMIR_FLUX      | TEMIR_MO_on  | 98.1  | 9.01  | 0.863 |
| - - -      | TEMIR_MO_off    | TEMIR_MO_off | 98.9  | -9.72 | 0.857 |
| - - -      | TEMIR_MO_on     |              |       |       |       |

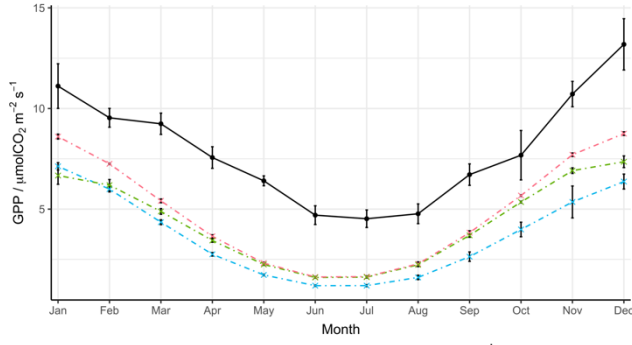

Site: AU-Tum  
PFT of Site: EBF  
Year Range: 2009 - 2013

| GPP Output |                 | $R^2$ / %    | B / % | N     |        |
|------------|-----------------|--------------|-------|-------|--------|
| —          | GPP_DT_VUT_MEAN | TEMIR_FLUX   | 89    | -53.9 | -0.888 |
| - - -      | TEMIR_FLUX      | TEMIR_MO_on  | 92.3  | -38.9 | -0.362 |
| - - -      | TEMIR_MO_off    | TEMIR_MO_off | 90.8  | -45.7 | -0.6   |
| - - -      | TEMIR_MO_on     |              |       |       |        |

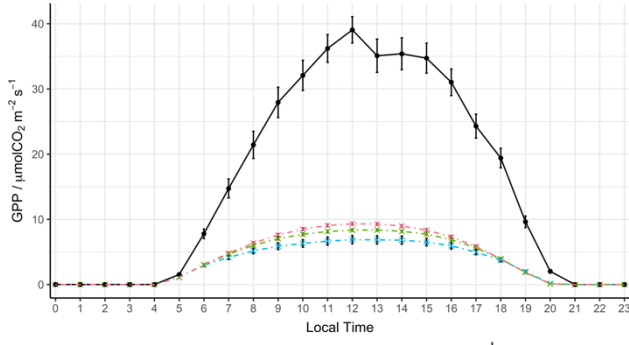

Site: BE-Lon  
PFT of Site: CRO  
Time Period: July of 2012

| GPP Output |                 | $R^2$ / %    | B / % | N     |       |
|------------|-----------------|--------------|-------|-------|-------|
| —          | GPP_DT_VUT_MEAN | TEMIR_FLUX   | 97    | -79.5 | 0.108 |
| - - -      | TEMIR_FLUX      | TEMIR_MO_on  | 98.1  | -74.3 | 0.166 |
| - - -      | TEMIR_MO_off    | TEMIR_MO_off | 97.8  | -76.2 | 0.145 |
| - - -      | TEMIR_MO_on     |              |       |       |       |

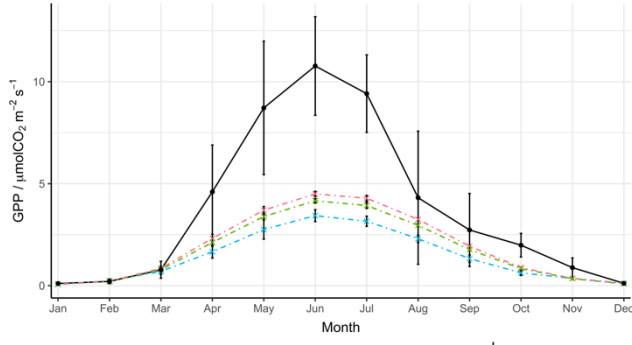

Site: BE-Lon  
PFT of Site: CRO  
Year Range: 2009 - 2013

| GPP Output |                 | $R^2$ / %    | B / % | N     |       |
|------------|-----------------|--------------|-------|-------|-------|
| —          | GPP_DT_VUT_MEAN | TEMIR_FLUX   | 95.1  | -62.4 | 0.274 |
| - - -      | TEMIR_FLUX      | TEMIR_MO_on  | 93.4  | -49.7 | 0.419 |
| - - -      | TEMIR_MO_off    | TEMIR_MO_off | 93.7  | -53.7 | 0.376 |
| - - -      | TEMIR_MO_on     |              |       |       |       |

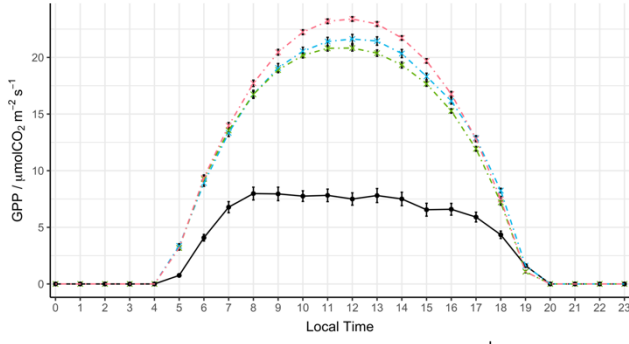

Site: CA-TP1  
PFT of Site: ENF  
Time Period: July of 2012

| GPP Output |                 | $R^2$ / %    | B / % | N   |        |
|------------|-----------------|--------------|-------|-----|--------|
| —          | GPP_DT_VUT_MEAN | TEMIR_FLUX   | 96.5  | 146 | -0.692 |
| - - -      | TEMIR_FLUX      | TEMIR_MO_on  | 95.4  | 160 | -0.859 |
| - - -      | TEMIR_MO_off    | TEMIR_MO_off | 96.6  | 138 | -0.608 |
| - - -      | TEMIR_MO_on     |              |       |     |        |

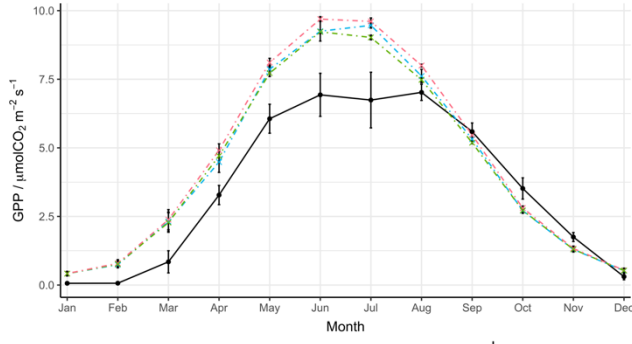

Site: CA-TP1  
PFT of Site: ENF  
Year Range: 2009 - 2013

| GPP Output |                 | $R^2$ / %    | B / % | N    |       |
|------------|-----------------|--------------|-------|------|-------|
| —          | GPP_DT_VUT_MEAN | TEMIR_FLUX   | 91.8  | 23.3 | 0.564 |
| - - -      | TEMIR_FLUX      | TEMIR_MO_on  | 91.8  | 28.2 | 0.513 |
| - - -      | TEMIR_MO_off    | TEMIR_MO_off | 91.8  | 21.8 | 0.578 |
| - - -      | TEMIR_MO_on     |              |       |      |       |

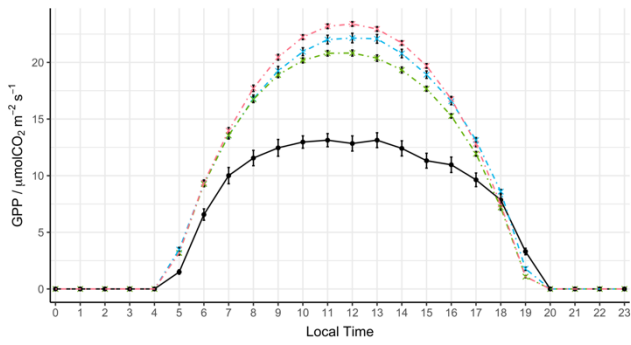

Site: CA-TP3  
PFT of Site: ENF  
Time Period: July of 2012

| GPP Output      |              | $R^2$ / % | B / % | N     |
|-----------------|--------------|-----------|-------|-------|
| GPP_DT_VUT_MEAN | TEMIR_FLUX   | 97.5      | 53.2  | 0.352 |
|                 | TEMIR_MO_on  | 96.4      | 57.7  | 0.282 |
|                 | TEMIR_MO_off | 97.2      | 44.5  | 0.433 |

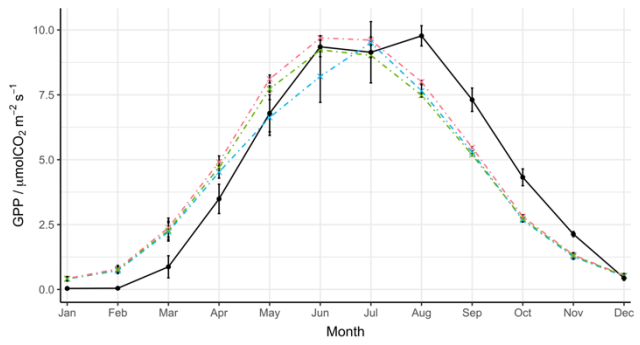

Site: CA-TP3  
PFT of Site: ENF  
Year Range: 2009 - 2013

| GPP Output      |              | $R^2$ / % | B / % | N     |
|-----------------|--------------|-----------|-------|-------|
| GPP_DT_VUT_MEAN | TEMIR_FLUX   | 91.4      | -7.63 | 0.704 |
|                 | TEMIR_MO_on  | 89.8      | 0.671 | 0.694 |
|                 | TEMIR_MO_off | 89.5      | -4.37 | 0.704 |

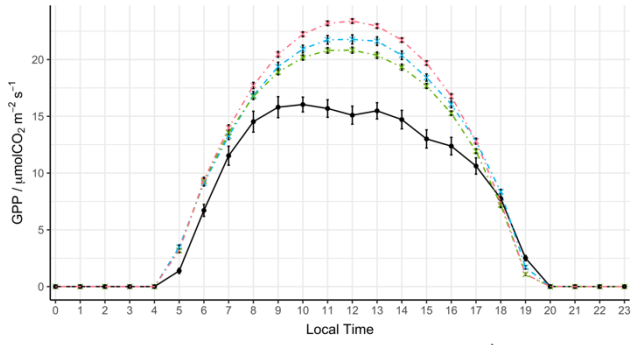

Site: CA-TP4  
PFT of Site: ENF  
Time Period: July of 2012

| GPP Output      |              | $R^2$ / % | B / % | N     |
|-----------------|--------------|-----------|-------|-------|
| GPP_DT_VUT_MEAN | TEMIR_FLUX   | 98.4      | 30.3  | 0.643 |
|                 | TEMIR_MO_on  | 97.8      | 36.2  | 0.564 |
|                 | TEMIR_MO_off | 98.5      | 24.8  | 0.69  |

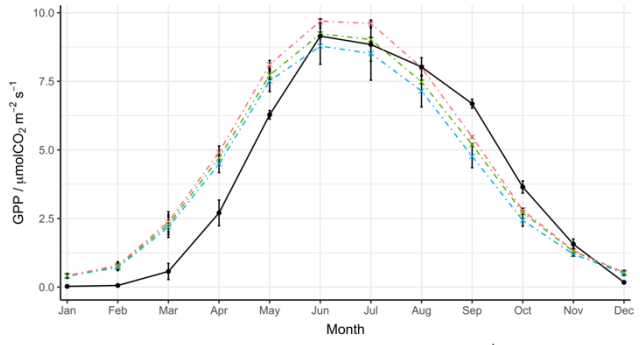

Site: CA-TP4  
PFT of Site: ENF  
Year Range: 2009 - 2013

| GPP Output      |              | $R^2$ / % | B / % | N     |
|-----------------|--------------|-----------|-------|-------|
| GPP_DT_VUT_MEAN | TEMIR_FLUX   | 90.4      | 1.94  | 0.711 |
|                 | TEMIR_MO_on  | 91.8      | 13.3  | 0.713 |
|                 | TEMIR_MO_off | 91.6      | 7.6   | 0.736 |

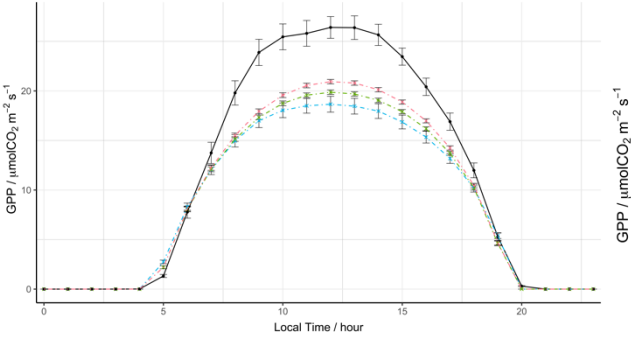

Site: CH-Cha  
PFT of Site: GRA  
Time Period: July of 2012

| GPP Output      |              | $R^2$ / % | B / % | N     |
|-----------------|--------------|-----------|-------|-------|
| GPP_DT_VUT_MEAN | TEMIR_FLUX   | 97.3      | -12   | 0.812 |
|                 | TEMIR_MO_on  | 97.5      | -9.13 | 0.834 |
|                 | TEMIR_MO_off | 96.9      | -14   | 0.792 |

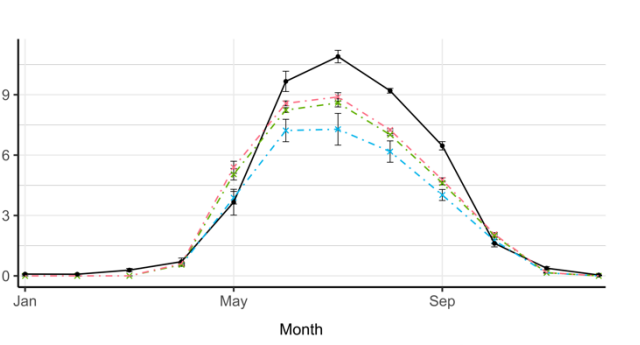

Site: CH-Cha  
PFT of Site: GRA  
Year Range: 2009 - 2013

| GPP Output      |              | $R^2$ / % | B / % | N     |
|-----------------|--------------|-----------|-------|-------|
| GPP_DT_VUT_MEAN | TEMIR_FLUX   | 93.8      | -29.2 | 0.417 |
|                 | TEMIR_MO_on  | 93.6      | -26.8 | 0.429 |
|                 | TEMIR_MO_off | 93.5      | -30.9 | 0.382 |

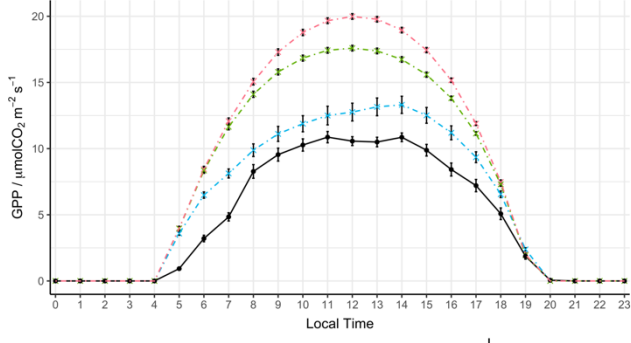

Site: CH-Dav  
PFT of Site: ENF  
Time Period: July of 2012

| GPP Output      |              | $R^2$ / % | B / % | N      |
|-----------------|--------------|-----------|-------|--------|
| GPP_DT_VUT_MEAN | TEMIR_FLUX   | 97.5      | 28.8  | 0.676  |
|                 | TEMIR_MO_on  | 98.1      | 85.1  | 0.0451 |
|                 | TEMIR_MO_off | 97.5      | 68.7  | 0.228  |

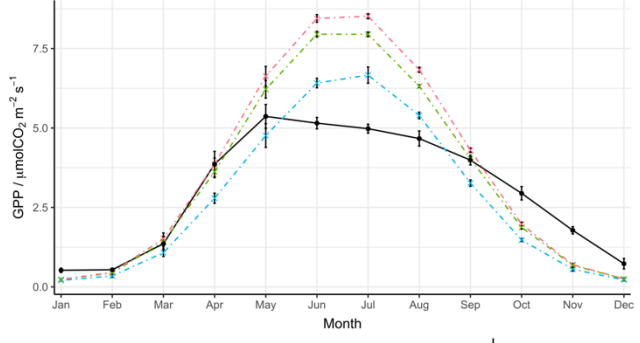

Site: CH-Dav  
PFT of Site: ENF  
Year Range: 2009 - 2013

| GPP Output      |              | $R^2$ / % | B / % | N     |
|-----------------|--------------|-----------|-------|-------|
| GPP_DT_VUT_MEAN | TEMIR_FLUX   | 87.3      | -7.59 | 0.5   |
|                 | TEMIR_MO_on  | 89.1      | 21.8  | 0.323 |
|                 | TEMIR_MO_off | 89.2      | 14.2  | 0.421 |

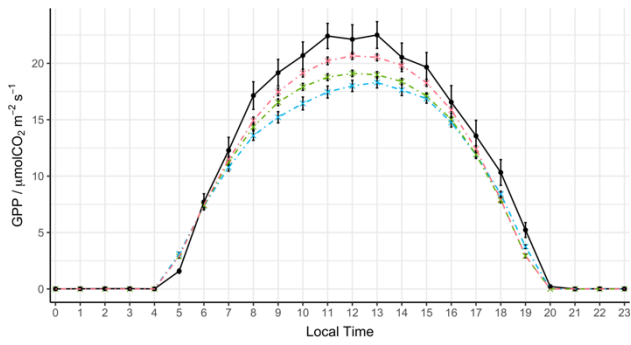

Site: CH-Fru  
PFT of Site: GRA  
Time Period: July of 2012

| GPP Output   |                 | $R^2$ / %    | B / % | N     |       |
|--------------|-----------------|--------------|-------|-------|-------|
| —●—          | GPP_DT_VUT_MEAN | TEMIR_FLUX   | 99.3  | -16.5 | 0.796 |
| - - -▲ - - - | TEMIR_FLUX      | TEMIR_MO_on  | 99.4  | -8.57 | 0.889 |
| - - -■ - - - | TEMIR_MO_off    | TEMIR_MO_off | 99.4  | -13.6 | 0.832 |
| - - -★ - - - | TEMIR_MO_on     |              |       |       |       |

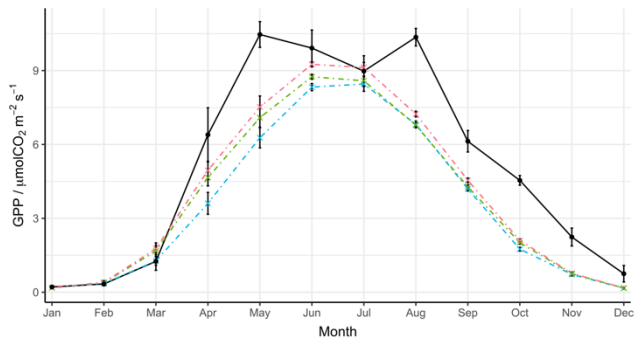

Site: CH-Fru  
PFT of Site: GRA  
Year Range: 2009 – 2013

| GPP Output   |                 | $R^2$ / %    | B / % | N     |       |
|--------------|-----------------|--------------|-------|-------|-------|
| —●—          | GPP_DT_VUT_MEAN | TEMIR_FLUX   | 90.2  | -31.6 | 0.545 |
| - - -▲ - - - | TEMIR_FLUX      | TEMIR_MO_on  | 91.8  | -22   | 0.65  |
| - - -■ - - - | TEMIR_MO_off    | TEMIR_MO_off | 91.8  | -26.4 | 0.599 |
| - - -★ - - - | TEMIR_MO_on     |              |       |       |       |

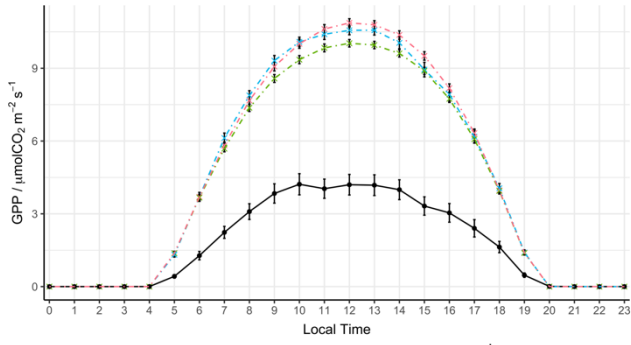

Site: CH-Oe2  
PFT of Site: CRO  
Time Period: July of 2012

| GPP Output   |                 | $R^2$ / %    | B / % | N   |        |
|--------------|-----------------|--------------|-------|-----|--------|
| —●—          | GPP_DT_VUT_MEAN | TEMIR_FLUX   | 99.7  | 156 | -0.729 |
| - - -▲ - - - | TEMIR_FLUX      | TEMIR_MO_on  | 99.4  | 159 | -0.759 |
| - - -■ - - - | TEMIR_MO_off    | TEMIR_MO_off | 99.3  | 144 | -0.598 |
| - - -★ - - - | TEMIR_MO_on     |              |       |     |        |

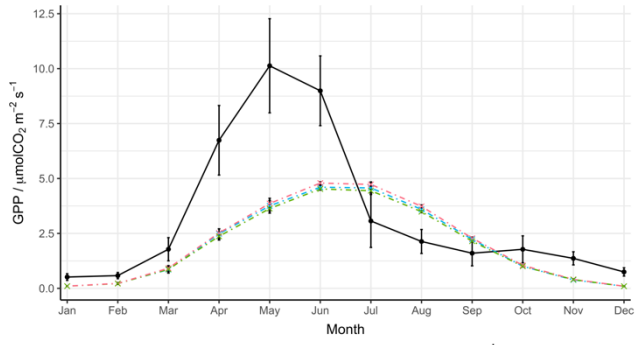

Site: CH-Oe2  
PFT of Site: CRO  
Year Range: 2009 – 2013

| GPP Output   |                 | $R^2$ / %    | B / % | N     |       |
|--------------|-----------------|--------------|-------|-------|-------|
| —●—          | GPP_DT_VUT_MEAN | TEMIR_FLUX   | 50.9  | -39.4 | 0.29  |
| - - -▲ - - - | TEMIR_FLUX      | TEMIR_MO_on  | 50.6  | -37.3 | 0.294 |
| - - -■ - - - | TEMIR_MO_off    | TEMIR_MO_off | 50.8  | -40.9 | 0.291 |
| - - -★ - - - | TEMIR_MO_on     |              |       |       |       |

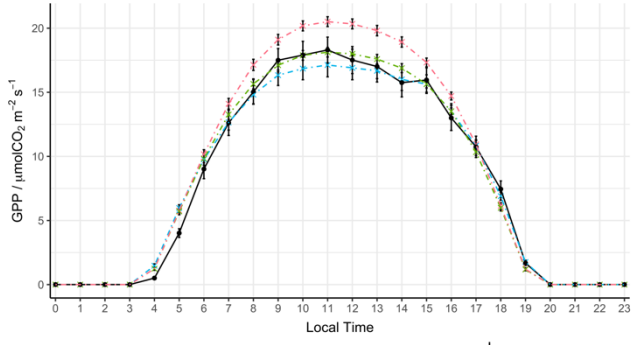

Site: CZ-wet  
PFT of Site: GRA  
Time Period: July of 2012

| GPP Output   |                 | $R^2$ / %    | B / % | N      |       |
|--------------|-----------------|--------------|-------|--------|-------|
| —●—          | GPP_DT_VUT_MEAN | TEMIR_FLUX   | 99.3  | -0.403 | 0.939 |
| - - -▲ - - - | TEMIR_FLUX      | TEMIR_MO_on  | 99.3  | 12.2   | 0.837 |
| - - -■ - - - | TEMIR_MO_off    | TEMIR_MO_off | 99.3  | 2.02   | 0.937 |
| - - -★ - - - | TEMIR_MO_on     |              |       |        |       |

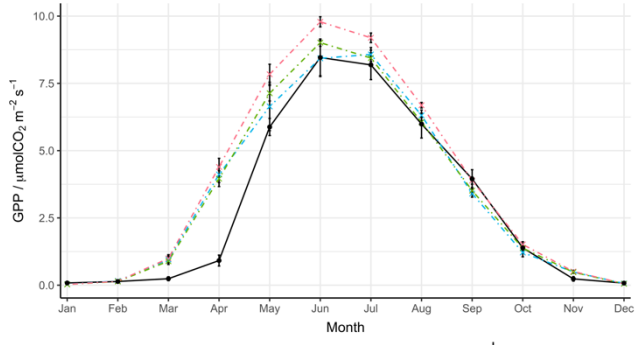

Site: CZ-wet  
PFT of Site: GRA  
Year Range: 2009 – 2013

| GPP Output   |                 | $R^2$ / %    | B / % | N    |       |
|--------------|-----------------|--------------|-------|------|-------|
| —●—          | GPP_DT_VUT_MEAN | TEMIR_FLUX   | 92    | 13.7 | 0.817 |
| - - -▲ - - - | TEMIR_FLUX      | TEMIR_MO_on  | 92.6  | 26.7 | 0.723 |
| - - -■ - - - | TEMIR_MO_off    | TEMIR_MO_off | 92.9  | 15.6 | 0.813 |
| - - -★ - - - | TEMIR_MO_on     |              |       |      |       |

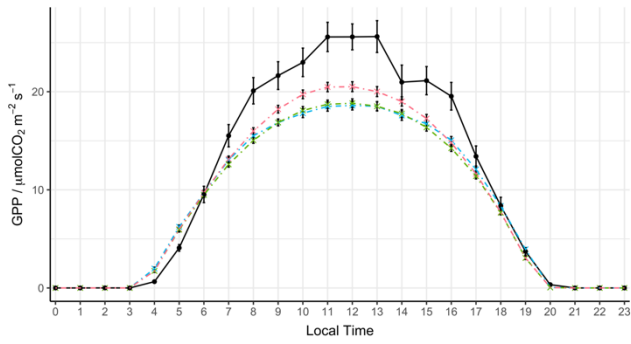

Site: DE-Akm  
PFT of Site: GRA  
Time Period: July of 2012

| GPP Output   |                 | $R^2$ / %    | B / % | N     |       |
|--------------|-----------------|--------------|-------|-------|-------|
| —●—          | GPP_DT_VUT_MEAN | TEMIR_FLUX   | 98.1  | -18.7 | 0.753 |
| - - -▲ - - - | TEMIR_FLUX      | TEMIR_MO_on  | 98.9  | -15.4 | 0.797 |
| - - -■ - - - | TEMIR_MO_off    | TEMIR_MO_off | 98.5  | -20.3 | 0.743 |
| - - -★ - - - | TEMIR_MO_on     |              |       |       |       |

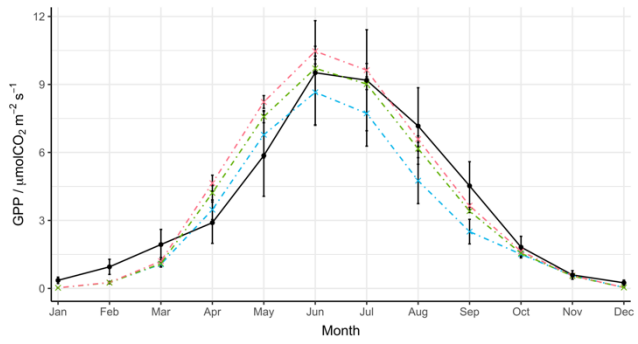

Site: DE-Akm  
PFT of Site: GRA  
Year Range: 2009 – 2013

| GPP Output   |                 | $R^2$ / %    | B / % | N     |       |
|--------------|-----------------|--------------|-------|-------|-------|
| —●—          | GPP_DT_VUT_MEAN | TEMIR_FLUX   | 92    | -17.1 | 0.694 |
| - - -▲ - - - | TEMIR_FLUX      | TEMIR_MO_on  | 94    | 4.16  | 0.739 |
| - - -■ - - - | TEMIR_MO_off    | TEMIR_MO_off | 94.5  | -3.23 | 0.774 |
| - - -★ - - - | TEMIR_MO_on     |              |       |       |       |



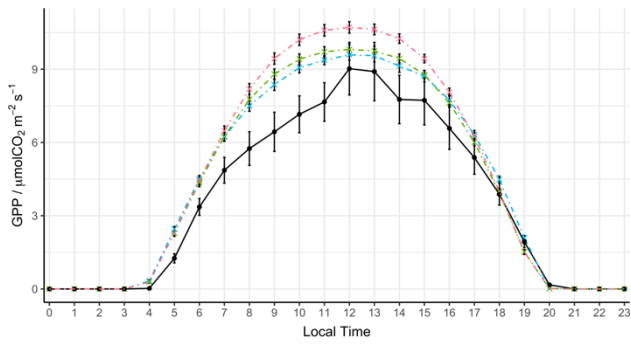

Site: DE-Geb  
PFT of Site: CRO  
Time Period: July of 2012

| GPP Output   |                 | $R^2$ / %    | B / % | N    |       |
|--------------|-----------------|--------------|-------|------|-------|
| —●—          | GPP_DT_VUT_MEAN | TEMIR_FLUX   | 98.6  | 20.1 | 0.759 |
| - - -▲ - - - | TEMIR_FLUX      | TEMIR_MO_on  | 98.1  | 28.4 | 0.65  |
| - - -■ - - - | TEMIR_MO_off    | TEMIR_MO_off | 98.1  | 20.3 | 0.744 |
| - - -★ - - - | TEMIR_MO_on     |              |       |      |       |

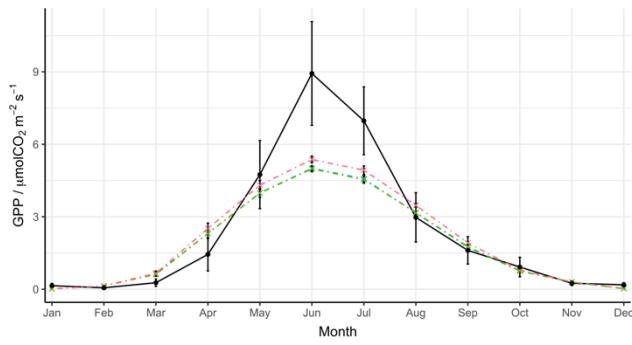

Site: DE-Geb  
PFT of Site: CRO  
Year Range: 2009 – 2013

| GPP Output   |                 | $R^2$ / %    | B / % | N     |       |
|--------------|-----------------|--------------|-------|-------|-------|
| —●—          | GPP_DT_VUT_MEAN | TEMIR_FLUX   | 89.9  | -20.5 | 0.674 |
| - - -▲ - - - | TEMIR_FLUX      | TEMIR_MO_on  | 89.3  | -14.2 | 0.686 |
| - - -■ - - - | TEMIR_MO_off    | TEMIR_MO_off | 89.6  | -20.8 | 0.671 |
| - - -★ - - - | TEMIR_MO_on     |              |       |       |       |

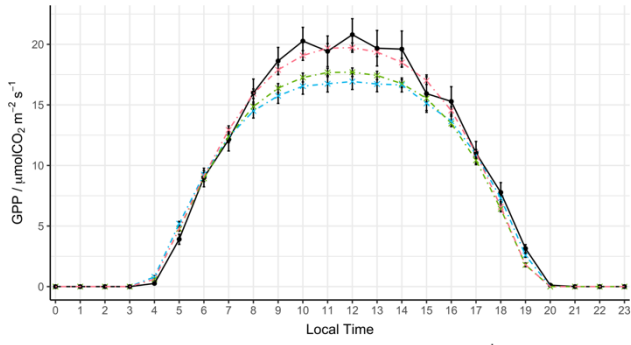

Site: DE-Gri  
PFT of Site: GRA  
Time Period: July of 2012

| GPP Output   |                 | $R^2$ / %    | B / % | N     |       |
|--------------|-----------------|--------------|-------|-------|-------|
| —●—          | GPP_DT_VUT_MEAN | TEMIR_FLUX   | 98.8  | -10.3 | 0.855 |
| - - -▲ - - - | TEMIR_FLUX      | TEMIR_MO_on  | 99.4  | -2.07 | 0.938 |
| - - -■ - - - | TEMIR_MO_off    | TEMIR_MO_off | 99.2  | -9.67 | 0.871 |
| - - -★ - - - | TEMIR_MO_on     |              |       |       |       |

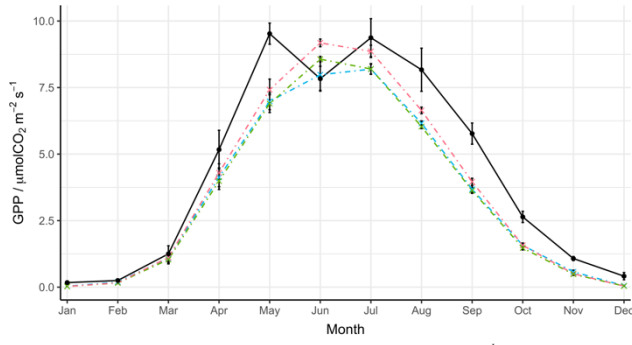

Site: DE-Gri  
PFT of Site: GRA  
Year Range: 2009 – 2013

| GPP Output   |                 | $R^2$ / %    | B / % | N     |       |
|--------------|-----------------|--------------|-------|-------|-------|
| —●—          | GPP_DT_VUT_MEAN | TEMIR_FLUX   | 95.6  | -21.3 | 0.718 |
| - - -▲ - - - | TEMIR_FLUX      | TEMIR_MO_on  | 94    | -15.2 | 0.737 |
| - - -■ - - - | TEMIR_MO_off    | TEMIR_MO_off | 93.6  | -21.5 | 0.686 |
| - - -★ - - - | TEMIR_MO_on     |              |       |       |       |

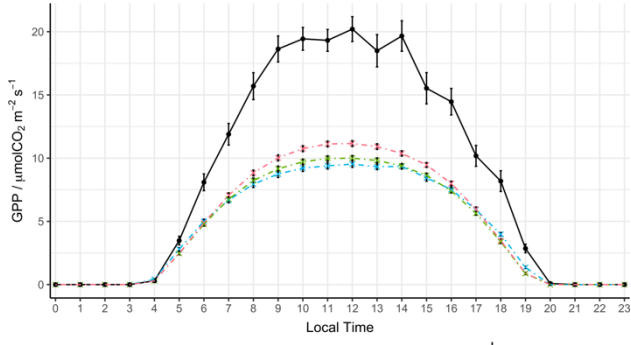

Site: DE-Kli  
PFT of Site: CRO  
Time Period: July of 2012

| GPP Output   |                 | $R^2$ / %    | B / % | N     |       |
|--------------|-----------------|--------------|-------|-------|-------|
| —●—          | GPP_DT_VUT_MEAN | TEMIR_FLUX   | 98.8  | -48.8 | 0.431 |
| - - -▲ - - - | TEMIR_FLUX      | TEMIR_MO_on  | 99.2  | -44   | 0.489 |
| - - -■ - - - | TEMIR_MO_off    | TEMIR_MO_off | 99    | -48.4 | 0.437 |
| - - -★ - - - | TEMIR_MO_on     |              |       |       |       |

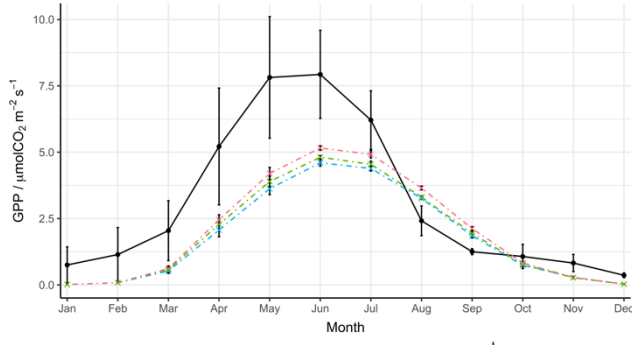

Site: DE-Kli  
PFT of Site: CRO  
Year Range: 2009 – 2013

| GPP Output   |                 | $R^2$ / %    | B / % | N     |       |
|--------------|-----------------|--------------|-------|-------|-------|
| —●—          | GPP_DT_VUT_MEAN | TEMIR_FLUX   | 76.9  | -42.1 | 0.378 |
| - - -▲ - - - | TEMIR_FLUX      | TEMIR_MO_on  | 78.1  | -34.2 | 0.43  |
| - - -■ - - - | TEMIR_MO_off    | TEMIR_MO_off | 79    | -39.2 | 0.404 |
| - - -★ - - - | TEMIR_MO_on     |              |       |       |       |

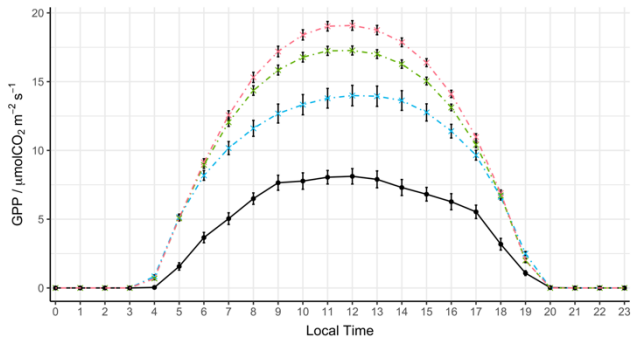

Site: DE-Lkb  
PFT of Site: ENF  
Time Period: July of 2012

| GPP Output   |                 | $R^2$ / %    | B / % | N    |        |
|--------------|-----------------|--------------|-------|------|--------|
| —●—          | GPP_DT_VUT_MEAN | TEMIR_FLUX   | 98.5  | 85.3 | 0.0123 |
| - - -▲ - - - | TEMIR_FLUX      | TEMIR_MO_on  | 99.3  | 135  | -0.566 |
| - - -■ - - - | TEMIR_MO_off    | TEMIR_MO_off | 99.3  | 118  | -0.37  |
| - - -★ - - - | TEMIR_MO_on     |              |       |      |        |

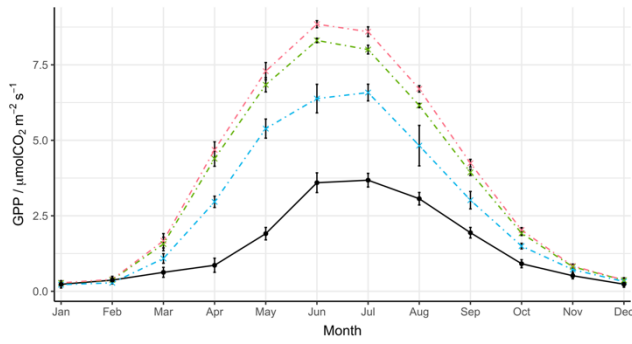

Site: DE-Lkb  
PFT of Site: ENF  
Year Range: 2009 – 2013

| GPP Output   |                 | $R^2$ / %    | B / % | N    |        |
|--------------|-----------------|--------------|-------|------|--------|
| —●—          | GPP_DT_VUT_MEAN | TEMIR_FLUX   | 89.9  | 85.4 | -0.157 |
| - - -▲ - - - | TEMIR_FLUX      | TEMIR_MO_on  | 87.9  | 156  | -1.09  |
| - - -■ - - - | TEMIR_MO_off    | TEMIR_MO_off | 87.5  | 139  | -0.863 |
| - - -★ - - - | TEMIR_MO_on     |              |       |      |        |

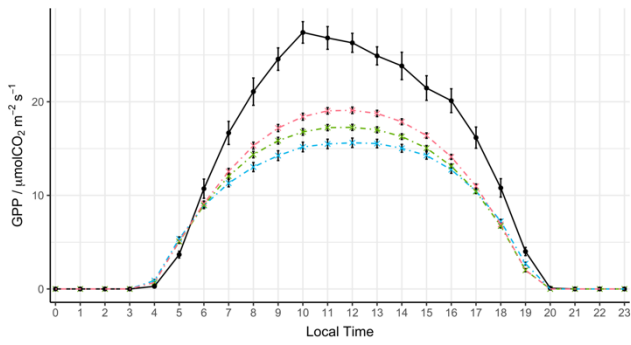

Site: DE-Obe  
PFT of Site: ENF  
Time Period: July of 2012

| GPP Output   |                 | $R^2$ / % | B / % | N     |
|--------------|-----------------|-----------|-------|-------|
| —●—          | GPP_DT_VUT_MEAN | 98        | -36.2 | 0.566 |
| - - -▲ - - - | TEMIR_FLUX      | 99        | -27   | 0.675 |
| - - -■ - - - | TEMIR_MO_off    | 98.8      | -32.3 | 0.615 |
| - - -◆ - - - | TEMIR_MO_on     |           |       |       |

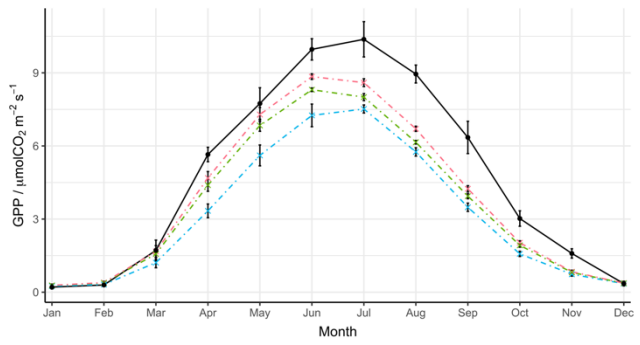

Site: DE-Obe  
PFT of Site: ENF  
Year Range: 2009 - 2013

| GPP Output   |                 | $R^2$ / % | B / % | N     |
|--------------|-----------------|-----------|-------|-------|
| —●—          | GPP_DT_VUT_MEAN | 97.8      | -33.5 | 0.547 |
| - - -▲ - - - | TEMIR_FLUX      | 97.4      | -18.3 | 0.746 |
| - - -■ - - - | TEMIR_MO_off    | 97.1      | -23.6 | 0.675 |
| - - -◆ - - - | TEMIR_MO_on     |           |       |       |

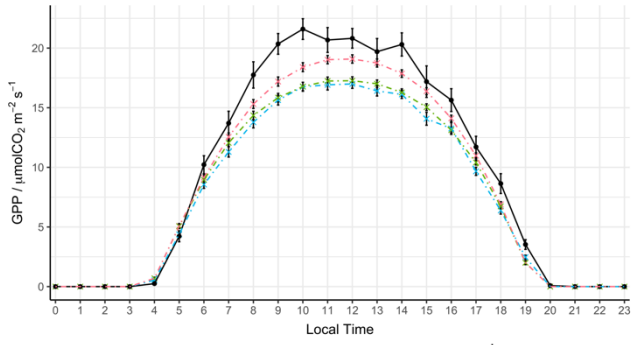

Site: DE-Tha  
PFT of Site: ENF  
Time Period: July of 2012

| GPP Output   |                 | $R^2$ / % | B / % | N     |
|--------------|-----------------|-----------|-------|-------|
| —●—          | GPP_DT_VUT_MEAN | 99.7      | -19.1 | 0.772 |
| - - -▲ - - - | TEMIR_FLUX      | 99.4      | -10.1 | 0.868 |
| - - -■ - - - | TEMIR_MO_off    | 99.3      | -16.6 | 0.792 |
| - - -◆ - - - | TEMIR_MO_on     |           |       |       |

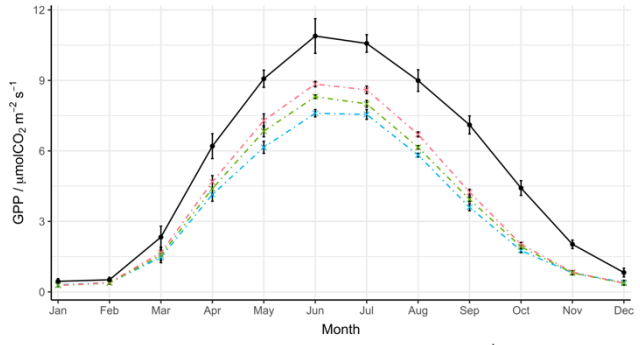

Site: DE-Tha  
PFT of Site: ENF  
Year Range: 2009 - 2013

| GPP Output   |                 | $R^2$ / % | B / % | N     |
|--------------|-----------------|-----------|-------|-------|
| —●—          | GPP_DT_VUT_MEAN | 96.8      | -36.9 | 0.447 |
| - - -▲ - - - | TEMIR_FLUX      | 97.1      | -27.5 | 0.587 |
| - - -■ - - - | TEMIR_MO_off    | 97        | -32.2 | 0.516 |
| - - -◆ - - - | TEMIR_MO_on     |           |       |       |

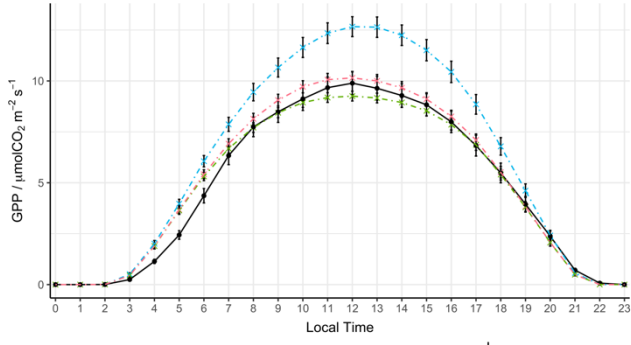

Site: DK-NuF  
PFT of Site: GRA  
Time Period: July of 2012

| GPP Output   |                 | $R^2$ / % | B / %  | N     |
|--------------|-----------------|-----------|--------|-------|
| —●—          | GPP_DT_VUT_MEAN | 99.5      | 28.5   | 0.606 |
| - - -▲ - - - | TEMIR_FLUX      | 99.2      | 6.06   | 0.9   |
| - - -■ - - - | TEMIR_MO_off    | 98.9      | 0.0272 | 0.917 |
| - - -◆ - - - | TEMIR_MO_on     |           |        |       |

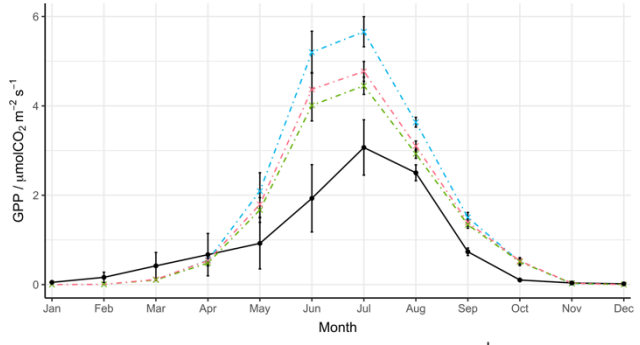

Site: DK-NuF  
PFT of Site: GRA  
Year Range: 2009 - 2013

| GPP Output   |                 | $R^2$ / % | B / % | N       |
|--------------|-----------------|-----------|-------|---------|
| —●—          | GPP_DT_VUT_MEAN | 89.9      | 81.6  | -0.0247 |
| - - -▲ - - - | TEMIR_FLUX      | 90        | 56.8  | 0.246   |
| - - -■ - - - | TEMIR_MO_off    | 90.5      | 46.2  | 0.347   |
| - - -◆ - - - | TEMIR_MO_on     |           |       |         |

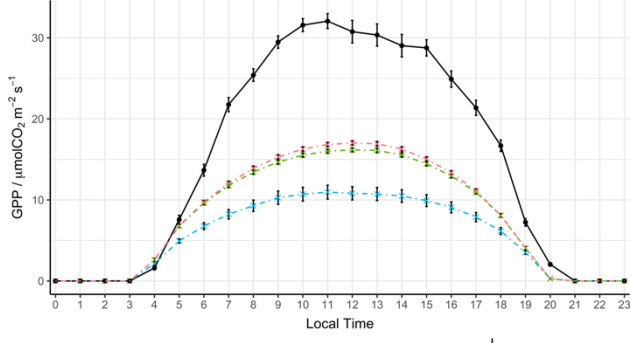

Site: DK-Sor  
PFT of Site: DBF  
Time Period: July of 2012

| GPP Output   |                 | $R^2$ / % | B / % | N     |
|--------------|-----------------|-----------|-------|-------|
| —●—          | GPP_DT_VUT_MEAN | 97.7      | -62.7 | 0.231 |
| - - -▲ - - - | TEMIR_FLUX      | 98.3      | -44.7 | 0.446 |
| - - -■ - - - | TEMIR_MO_off    | 98.1      | -46.7 | 0.423 |
| - - -◆ - - - | TEMIR_MO_on     |           |       |       |

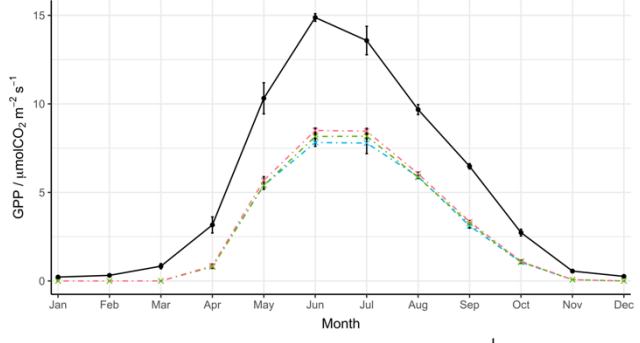

Site: DK-Sor  
PFT of Site: DBF  
Year Range: 2009 - 2013

| GPP Output   |                 | $R^2$ / % | B / % | N     |
|--------------|-----------------|-----------|-------|-------|
| —●—          | GPP_DT_VUT_MEAN | 98.8      | -49.3 | 0.459 |
| - - -▲ - - - | TEMIR_FLUX      | 98.9      | -45.9 | 0.496 |
| - - -■ - - - | TEMIR_MO_off    | 98.8      | -48   | 0.473 |
| - - -◆ - - - | TEMIR_MO_on     |           |       |       |

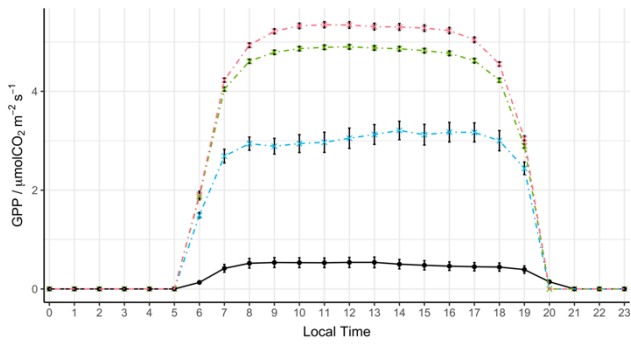

Site: ES-LJu  
PFT of Site: OSH  
Time Period: July of 2012

| GPP Output   |                 | $R^2$ / %    | B / % | N   |       |
|--------------|-----------------|--------------|-------|-----|-------|
| —●—          | GPP_DT_VUT_MEAN | TEMIR_FLUX   | 95.8  | 508 | -5.15 |
| - - -▲ - - - | TEMIR_FLUX      | TEMIR_MO_on  | 97    | 898 | -9.85 |
| - - -■ - - - | TEMIR_MO_off    | TEMIR_MO_off | 97.1  | 822 | -8.94 |
| - - -★ - - - | TEMIR_MO_on     |              |       |     |       |

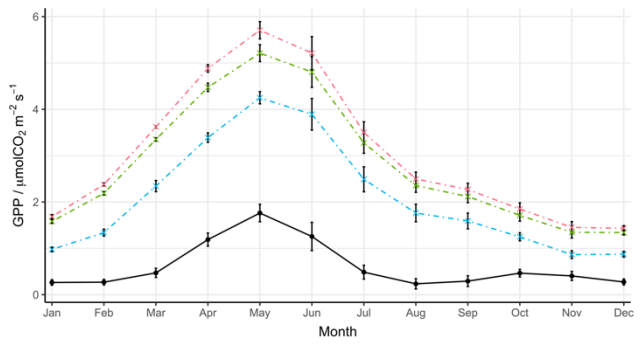

Site: ES-LJu  
PFT of Site: OSH  
Year Range: 2009 – 2013

| GPP Output   |                 | $R^2$ / %    | B / % | N   |       |
|--------------|-----------------|--------------|-------|-----|-------|
| —●—          | GPP_DT_VUT_MEAN | TEMIR_FLUX   | 83.7  | 239 | -2.73 |
| - - -▲ - - - | TEMIR_FLUX      | TEMIR_MO_on  | 81.7  | 395 | -5.16 |
| - - -■ - - - | TEMIR_MO_off    | TEMIR_MO_off | 80.7  | 358 | -4.58 |
| - - -★ - - - | TEMIR_MO_on     |              |       |     |       |

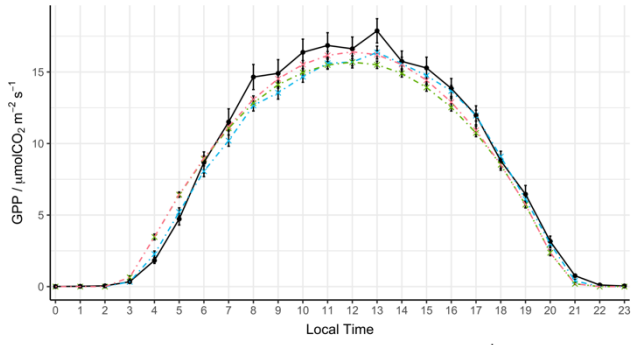

Site: FI-Hyy  
PFT of Site: ENF  
Time Period: July of 2012

| GPP Output   |                 | $R^2$ / %    | B / % | N     |       |
|--------------|-----------------|--------------|-------|-------|-------|
| —●—          | GPP_DT_VUT_MEAN | TEMIR_FLUX   | 99.4  | -5.71 | 0.907 |
| - - -▲ - - - | TEMIR_FLUX      | TEMIR_MO_on  | 98.9  | -3.69 | 0.897 |
| - - -■ - - - | TEMIR_MO_off    | TEMIR_MO_off | 98.8  | -6.29 | 0.863 |
| - - -★ - - - | TEMIR_MO_on     |              |       |       |       |

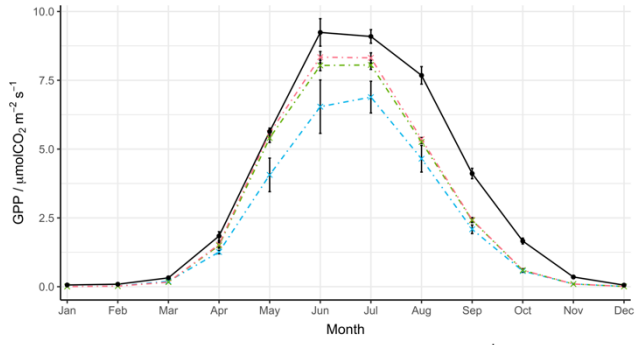

Site: FI-Hyy  
PFT of Site: ENF  
Year Range: 2009 – 2013

| GPP Output   |                 | $R^2$ / %    | B / % | N     |       |
|--------------|-----------------|--------------|-------|-------|-------|
| —●—          | GPP_DT_VUT_MEAN | TEMIR_FLUX   | 98    | -34.2 | 0.639 |
| - - -▲ - - - | TEMIR_FLUX      | TEMIR_MO_on  | 96.6  | -19.1 | 0.798 |
| - - -■ - - - | TEMIR_MO_off    | TEMIR_MO_off | 96.9  | -21.4 | 0.775 |
| - - -★ - - - | TEMIR_MO_on     |              |       |       |       |

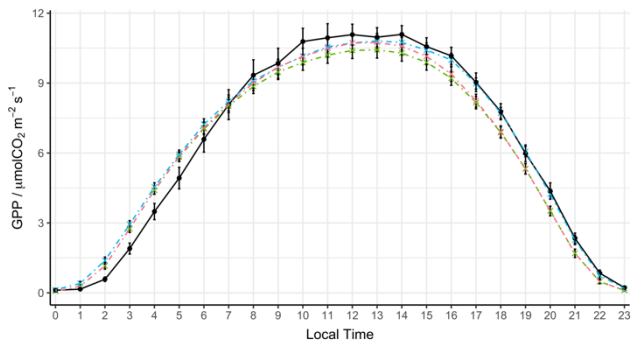

Site: FI-Sod  
PFT of Site: ENF  
Time Period: July of 2012

| GPP Output   |                 | $R^2$ / %    | B / % | N     |       |
|--------------|-----------------|--------------|-------|-------|-------|
| —●—          | GPP_DT_VUT_MEAN | TEMIR_FLUX   | 99    | 1.28  | 0.909 |
| - - -▲ - - - | TEMIR_FLUX      | TEMIR_MO_on  | 98.4  | -2.85 | 0.863 |
| - - -■ - - - | TEMIR_MO_off    | TEMIR_MO_off | 98.3  | -4.53 | 0.837 |
| - - -★ - - - | TEMIR_MO_on     |              |       |       |       |

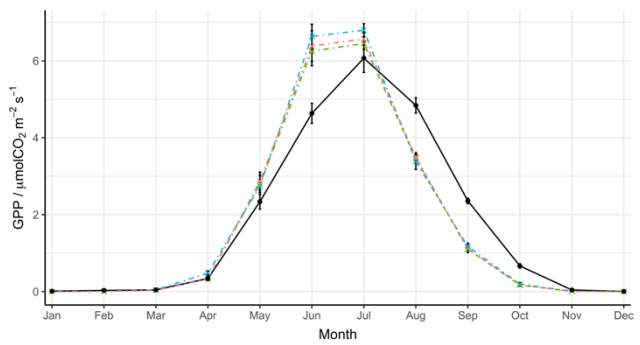

Site: FI-Sod  
PFT of Site: ENF  
Year Range: 2009 – 2013

| GPP Output   |                 | $R^2$ / %    | B / % | N     |       |
|--------------|-----------------|--------------|-------|-------|-------|
| —●—          | GPP_DT_VUT_MEAN | TEMIR_FLUX   | 88.8  | 0.402 | 0.715 |
| - - -▲ - - - | TEMIR_FLUX      | TEMIR_MO_on  | 89.9  | -1.85 | 0.737 |
| - - -■ - - - | TEMIR_MO_off    | TEMIR_MO_off | 90.1  | -3.63 | 0.748 |
| - - -★ - - - | TEMIR_MO_on     |              |       |       |       |

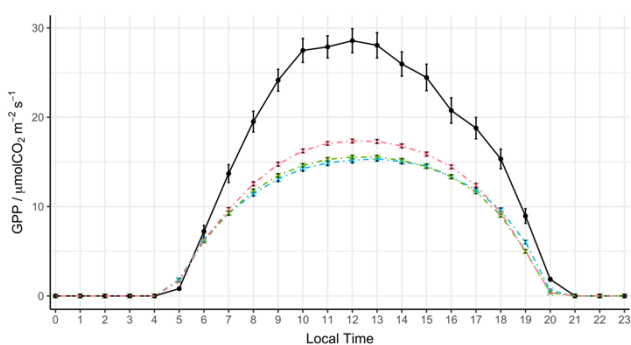

Site: FR-Fon  
PFT of Site: DBF  
Time Period: July of 2012

| GPP Output   |                 | $R^2$ / %    | B / % | N     |       |
|--------------|-----------------|--------------|-------|-------|-------|
| —●—          | GPP_DT_VUT_MEAN | TEMIR_FLUX   | 98.2  | -41.1 | 0.52  |
| - - -▲ - - - | TEMIR_FLUX      | TEMIR_MO_on  | 99.1  | -36.3 | 0.577 |
| - - -■ - - - | TEMIR_MO_off    | TEMIR_MO_off | 98.7  | -41.3 | 0.52  |
| - - -★ - - - | TEMIR_MO_on     |              |       |       |       |

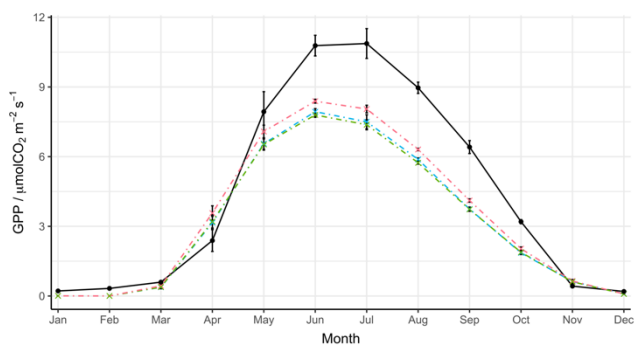

Site: FR-Fon  
PFT of Site: DBF  
Year Range: 2009 – 2013

| GPP Output   |                 | $R^2$ / %    | B / % | N     |       |
|--------------|-----------------|--------------|-------|-------|-------|
| —●—          | GPP_DT_VUT_MEAN | TEMIR_FLUX   | 95.9  | -27.9 | 0.644 |
| - - -▲ - - - | TEMIR_FLUX      | TEMIR_MO_on  | 95.6  | -22.1 | 0.689 |
| - - -■ - - - | TEMIR_MO_off    | TEMIR_MO_off | 95.6  | -28.6 | 0.633 |
| - - -★ - - - | TEMIR_MO_on     |              |       |       |       |

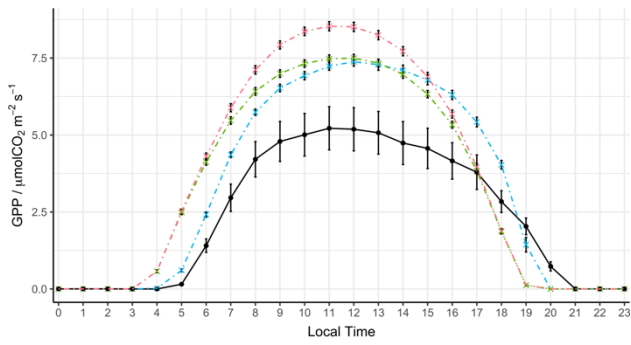

Site: FR-Gri  
PFT of Site: CRO  
Time Period: July of 2012

| GPP Output |                 | $R^2$ / %    | B / % | N    |       |
|------------|-----------------|--------------|-------|------|-------|
| —          | GPP_DT_VUT_MEAN | TEMIR_FLUX   | 98.2  | 39.9 | 0.474 |
| - - -      | TEMIR_FLUX      | TEMIR_MO_on  | 88.1  | 55.1 | 0.2   |
| - - -      | TEMIR_MO_off    | TEMIR_MO_off | 88    | 40.9 | 0.367 |
| - - -      | TEMIR_MO_on     |              |       |      |       |

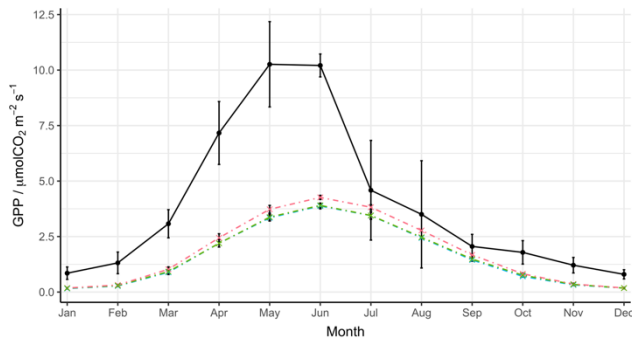

Site: FR-Gri  
PFT of Site: CRO  
Year Range: 2009 - 2013

| GPP Output |                 | $R^2$ / %    | B / % | N     |       |
|------------|-----------------|--------------|-------|-------|-------|
| —          | GPP_DT_VUT_MEAN | TEMIR_FLUX   | 76.5  | -58.8 | 0.172 |
| - - -      | TEMIR_FLUX      | TEMIR_MO_on  | 75.8  | -53.9 | 0.241 |
| - - -      | TEMIR_MO_off    | TEMIR_MO_off | 76.5  | -58.2 | 0.18  |
| - - -      | TEMIR_MO_on     |              |       |       |       |

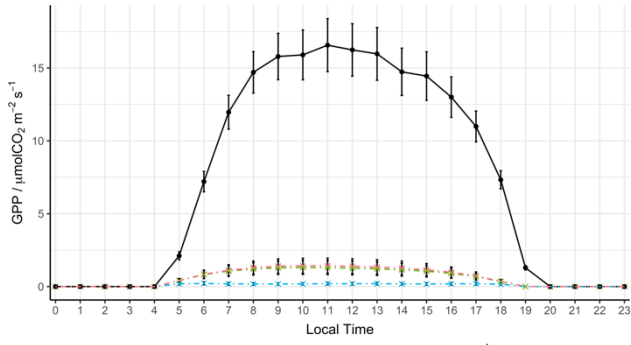

Site: IT-BCi  
PFT of Site: CRO  
Time Period: July of 2012

| GPP Output |                 | $R^2$ / %    | B / % | N     |         |
|------------|-----------------|--------------|-------|-------|---------|
| —          | GPP_DT_VUT_MEAN | TEMIR_FLUX   | 77.3  | -98.5 | -0.117  |
| - - -      | TEMIR_FLUX      | TEMIR_MO_on  | 96.8  | -91.5 | -0.0371 |
| - - -      | TEMIR_MO_off    | TEMIR_MO_off | 96.4  | -92.1 | -0.0442 |
| - - -      | TEMIR_MO_on     |              |       |       |         |

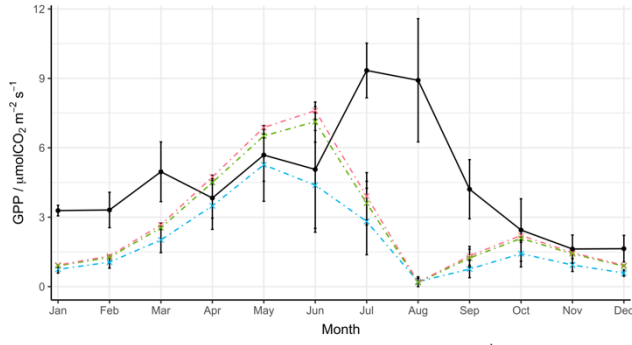

Site: IT-BCi  
PFT of Site: CRO  
Year Range: 2009 - 2013

| GPP Output |                 | $R^2$ / %    | B / % | N     |        |
|------------|-----------------|--------------|-------|-------|--------|
| —          | GPP_DT_VUT_MEAN | TEMIR_FLUX   | 6.51  | -56.4 | -0.351 |
| - - -      | TEMIR_FLUX      | TEMIR_MO_on  | 4.95  | -37.1 | -0.297 |
| - - -      | TEMIR_MO_off    | TEMIR_MO_off | 4.57  | -40.6 | -0.287 |
| - - -      | TEMIR_MO_on     |              |       |       |        |

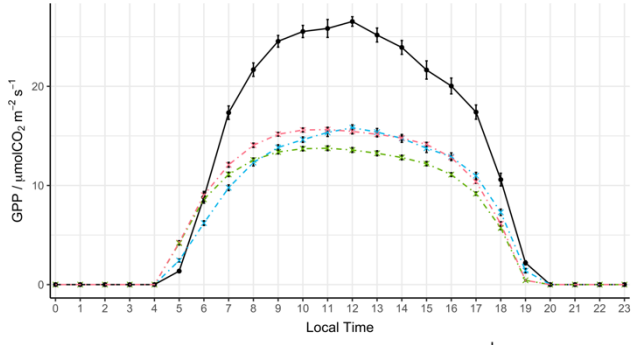

Site: IT-Col  
PFT of Site: DBF  
Time Period: July of 2012

| GPP Output |                 | $R^2$ / %    | B / % | N     |       |
|------------|-----------------|--------------|-------|-------|-------|
| —          | GPP_DT_VUT_MEAN | TEMIR_FLUX   | 99.2  | -38.8 | 0.567 |
| - - -      | TEMIR_FLUX      | TEMIR_MO_on  | 97.5  | -35.8 | 0.584 |
| - - -      | TEMIR_MO_off    | TEMIR_MO_off | 96.5  | -42.9 | 0.508 |
| - - -      | TEMIR_MO_on     |              |       |       |       |

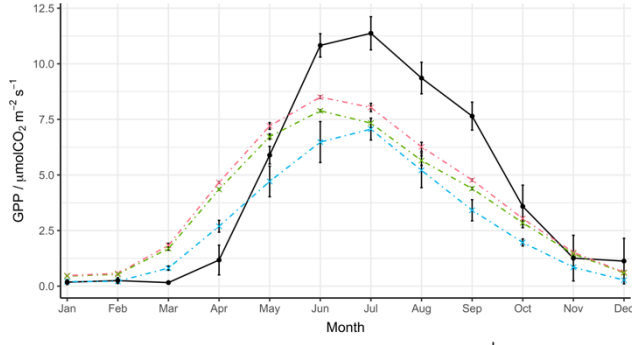

Site: IT-Col  
PFT of Site: DBF  
Year Range: 2009 - 2013

| GPP Output |                 | $R^2$ / %    | B / % | N     |       |
|------------|-----------------|--------------|-------|-------|-------|
| —          | GPP_DT_VUT_MEAN | TEMIR_FLUX   | 90.5  | -35.9 | 0.494 |
| - - -      | TEMIR_FLUX      | TEMIR_MO_on  | 81.2  | -10.1 | 0.566 |
| - - -      | TEMIR_MO_off    | TEMIR_MO_off | 80.1  | -16.9 | 0.534 |
| - - -      | TEMIR_MO_on     |              |       |       |       |

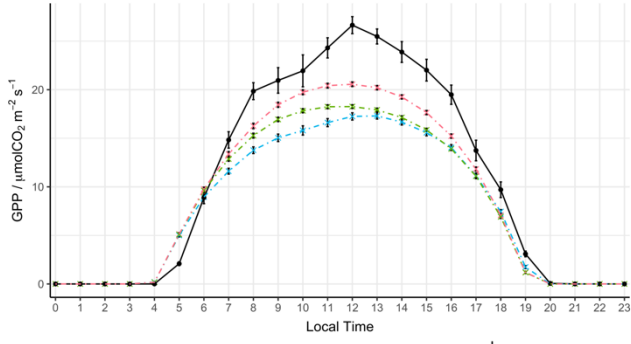

Site: IT-Lav  
PFT of Site: ENF  
Time Period: July of 2012

| GPP Output |                 | $R^2$ / %    | B / % | N     |       |
|------------|-----------------|--------------|-------|-------|-------|
| —          | GPP_DT_VUT_MEAN | TEMIR_FLUX   | 98    | -26.8 | 0.674 |
| - - -      | TEMIR_FLUX      | TEMIR_MO_on  | 98.3  | -15.8 | 0.788 |
| - - -      | TEMIR_MO_off    | TEMIR_MO_off | 97.6  | -22.8 | 0.712 |
| - - -      | TEMIR_MO_on     |              |       |       |       |

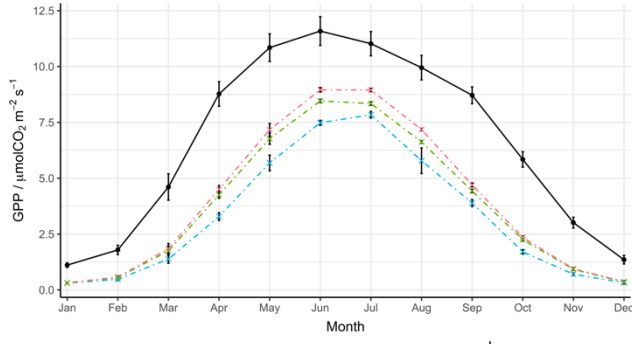

Site: IT-Lav  
PFT of Site: ENF  
Year Range: 2009 - 2013

| GPP Output |                 | $R^2$ / %    | B / % | N     |        |
|------------|-----------------|--------------|-------|-------|--------|
| —          | GPP_DT_VUT_MEAN | TEMIR_FLUX   | 90.2  | -50.6 | 0.0793 |
| - - -      | TEMIR_FLUX      | TEMIR_MO_on  | 93.5  | -39.1 | 0.288  |
| - - -      | TEMIR_MO_off    | TEMIR_MO_off | 93.7  | -42.7 | 0.222  |
| - - -      | TEMIR_MO_on     |              |       |       |        |

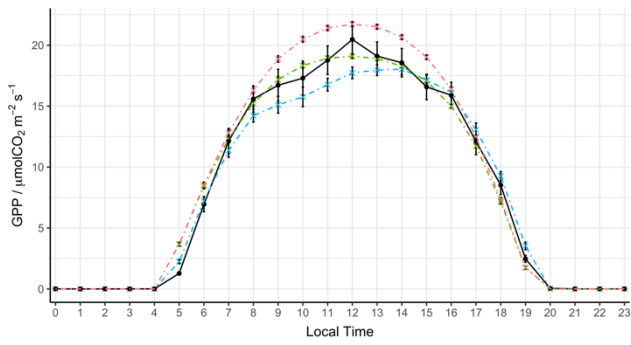

Site: IT-MBo  
PFT of Site: GRA  
Time Period: July of 2012

| GPP Output   |                 | $R^2$ / %    | B / % | N     |       |
|--------------|-----------------|--------------|-------|-------|-------|
| —●—          | GPP_DT_VUT_MEAN | TEMIR_FLUX   | 98.9  | -3.44 | 0.908 |
| - - -▲ - - - | TEMIR_FLUX      | TEMIR_MO_on  | 99    | 10.1  | 0.865 |
| - - -■ - - - | TEMIR_MO_off    | TEMIR_MO_off | 99    | 0.247 | 0.934 |
| - - -★ - - - | TEMIR_MO_on     |              |       |       |       |

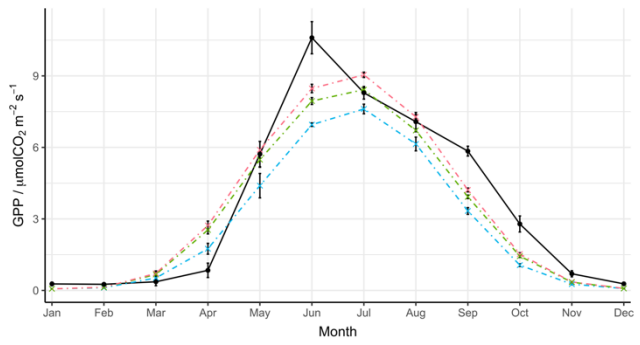

Site: IT-MBo  
PFT of Site: GRA  
Year Range: 2009 – 2013

| GPP Output   |                 | $R^2$ / %    | B / % | N     |       |
|--------------|-----------------|--------------|-------|-------|-------|
| —●—          | GPP_DT_VUT_MEAN | TEMIR_FLUX   | 92.2  | -25   | 0.672 |
| - - -▲ - - - | TEMIR_FLUX      | TEMIR_MO_on  | 91.7  | -5.84 | 0.764 |
| - - -■ - - - | TEMIR_MO_off    | TEMIR_MO_off | 92    | -12.3 | 0.757 |
| - - -★ - - - | TEMIR_MO_on     |              |       |       |       |

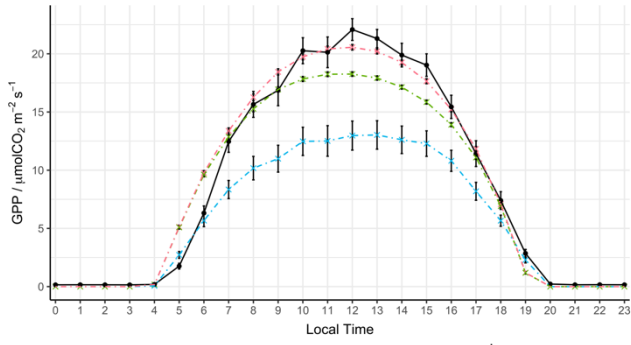

Site: IT-Ren  
PFT of Site: ENF  
Time Period: July of 2012

| GPP Output   |                 | $R^2$ / %    | B / % | N     |       |
|--------------|-----------------|--------------|-------|-------|-------|
| —●—          | GPP_DT_VUT_MEAN | TEMIR_FLUX   | 98.7  | -34.3 | 0.608 |
| - - -▲ - - - | TEMIR_FLUX      | TEMIR_MO_on  | 97.9  | 0.921 | 0.9   |
| - - -■ - - - | TEMIR_MO_off    | TEMIR_MO_off | 97    | -7.48 | 0.843 |
| - - -★ - - - | TEMIR_MO_on     |              |       |       |       |

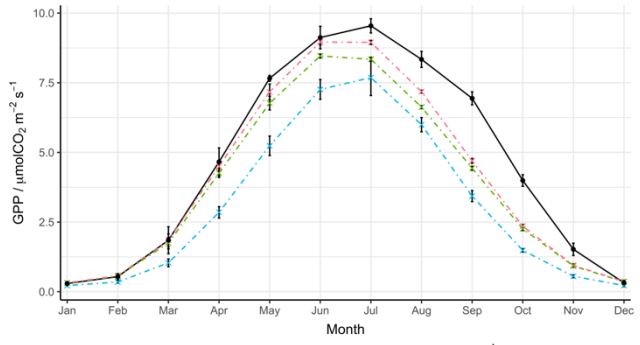

Site: IT-Ren  
PFT of Site: ENF  
Year Range: 2009 – 2013

| GPP Output   |                 | $R^2$ / %    | B / % | N     |       |
|--------------|-----------------|--------------|-------|-------|-------|
| —●—          | GPP_DT_VUT_MEAN | TEMIR_FLUX   | 94.2  | -33.7 | 0.511 |
| - - -▲ - - - | TEMIR_FLUX      | TEMIR_MO_on  | 96    | -12.6 | 0.811 |
| - - -■ - - - | TEMIR_MO_off    | TEMIR_MO_off | 96    | -17.8 | 0.738 |
| - - -★ - - - | TEMIR_MO_on     |              |       |       |       |

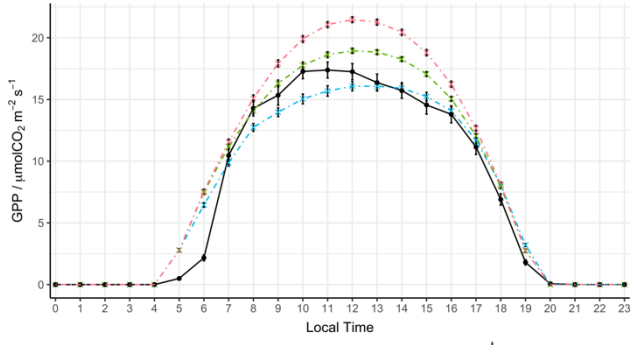

Site: IT-Tor  
PFT of Site: GRA  
Time Period: July of 2012

| GPP Output   |                 | $R^2$ / %    | B / % | N    |       |
|--------------|-----------------|--------------|-------|------|-------|
| —●—          | GPP_DT_VUT_MEAN | TEMIR_FLUX   | 97.1  | 1.08 | 0.881 |
| - - -▲ - - - | TEMIR_FLUX      | TEMIR_MO_on  | 97.7  | 24.3 | 0.744 |
| - - -■ - - - | TEMIR_MO_off    | TEMIR_MO_off | 97.6  | 13.8 | 0.853 |
| - - -★ - - - | TEMIR_MO_on     |              |       |      |       |

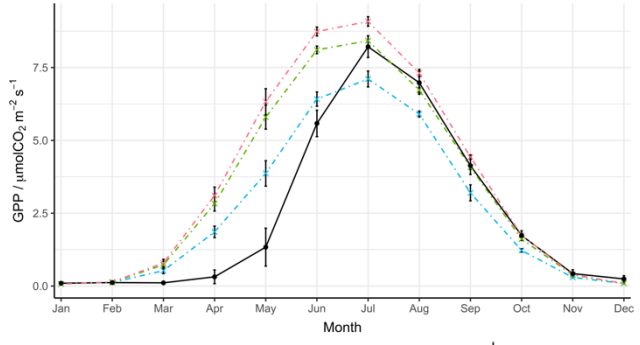

Site: IT-Tor  
PFT of Site: GRA  
Year Range: 2009 – 2013

| GPP Output   |                 | $R^2$ / %    | B / % | N    |       |
|--------------|-----------------|--------------|-------|------|-------|
| —●—          | GPP_DT_VUT_MEAN | TEMIR_FLUX   | 86.8  | 4.78 | 0.694 |
| - - -▲ - - - | TEMIR_FLUX      | TEMIR_MO_on  | 78.1  | 44.1 | 0.559 |
| - - -■ - - - | TEMIR_MO_off    | TEMIR_MO_off | 78.4  | 33   | 0.637 |
| - - -★ - - - | TEMIR_MO_on     |              |       |      |       |

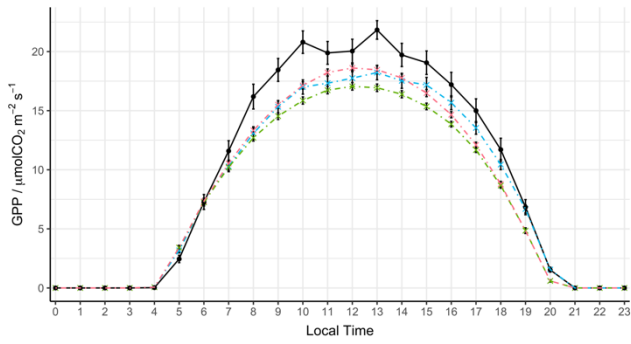

Site: NL-Loo  
PFT of Site: ENF  
Time Period: July of 2012

| GPP Output   |                 | $R^2$ / %    | B / % | N     |       |
|--------------|-----------------|--------------|-------|-------|-------|
| —●—          | GPP_DT_VUT_MEAN | TEMIR_FLUX   | 99.5  | -12   | 0.85  |
| - - -▲ - - - | TEMIR_FLUX      | TEMIR_MO_on  | 99.1  | -13.8 | 0.825 |
| - - -■ - - - | TEMIR_MO_off    | TEMIR_MO_off | 99.2  | -18.9 | 0.765 |
| - - -★ - - - | TEMIR_MO_on     |              |       |       |       |

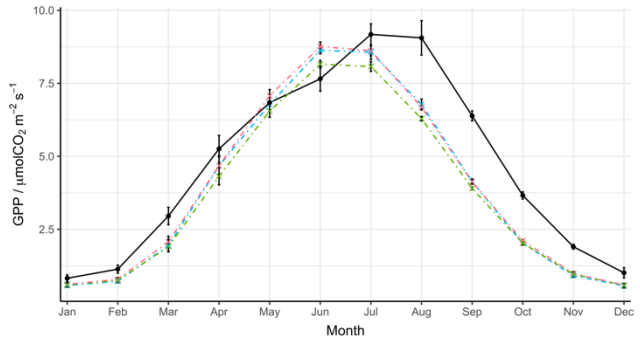

Site: NL-Loo  
PFT of Site: ENF  
Year Range: 2009 – 2013

| GPP Output   |                 | $R^2$ / %    | B / % | N     |       |
|--------------|-----------------|--------------|-------|-------|-------|
| —●—          | GPP_DT_VUT_MEAN | TEMIR_FLUX   | 91.6  | -17.1 | 0.65  |
| - - -▲ - - - | TEMIR_FLUX      | TEMIR_MO_on  | 90.5  | -15.7 | 0.652 |
| - - -■ - - - | TEMIR_MO_off    | TEMIR_MO_off | 91    | -21   | 0.612 |
| - - -★ - - - | TEMIR_MO_on     |              |       |       |       |

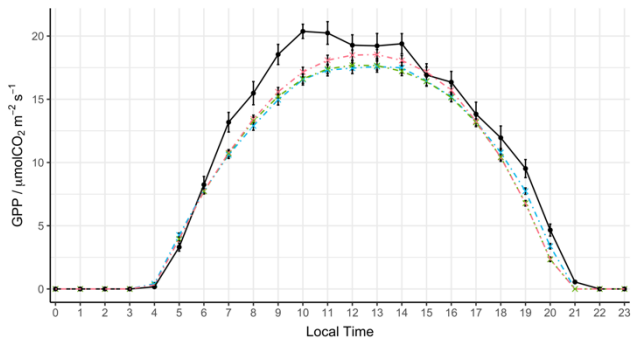

Site: RU-Fyo  
PFT of Site: ENF  
Time Period: July of 2012

| GPP Output   |                 | $R^2$ / %    | B / % | N     |       |
|--------------|-----------------|--------------|-------|-------|-------|
| —●—          | GPP_DT_VUT_MEAN | TEMIR_FLUX   | 98.8  | -11.7 | 0.834 |
| - - -▲ - - - | TEMIR_FLUX      | TEMIR_MO_on  | 98.5  | -10.1 | 0.857 |
| - - -■ - - - | TEMIR_MO_off    | TEMIR_MO_off | 98.7  | -12.6 | 0.828 |
| - - -★ - - - | TEMIR_MO_on     |              |       |       |       |

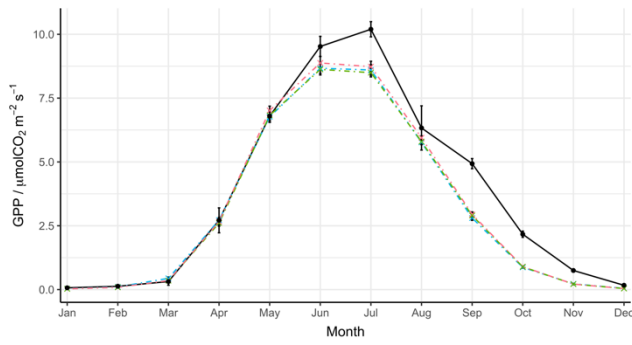

Site: RU-Fyo  
PFT of Site: ENF  
Year Range: 2009 – 2013

| GPP Output   |                 | $R^2$ / %    | B / % | N     |       |
|--------------|-----------------|--------------|-------|-------|-------|
| —●—          | GPP_DT_VUT_MEAN | TEMIR_FLUX   | 96.7  | -16   | 0.812 |
| - - -▲ - - - | TEMIR_FLUX      | TEMIR_MO_on  | 96.8  | -14.2 | 0.825 |
| - - -■ - - - | TEMIR_MO_off    | TEMIR_MO_off | 96.9  | -16.4 | 0.811 |
| - - -★ - - - | TEMIR_MO_on     |              |       |       |       |

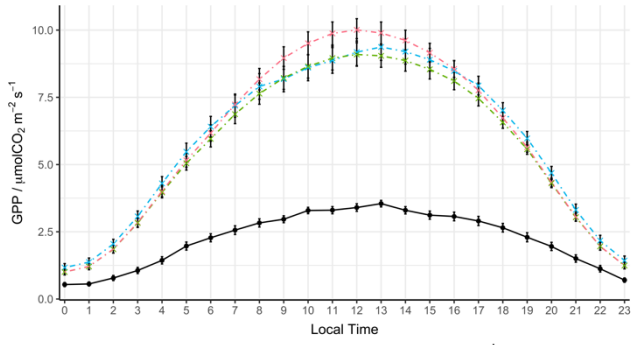

Site: RU-Sam  
PFT of Site: GRA  
Time Period: July of 2012

| GPP Output   |                 | $R^2$ / %    | B / % | N   |       |
|--------------|-----------------|--------------|-------|-----|-------|
| —●—          | GPP_DT_VUT_MEAN | TEMIR_FLUX   | 98.7  | 168 | -3.24 |
| - - -▲ - - - | TEMIR_FLUX      | TEMIR_MO_on  | 98.2  | 171 | -3.32 |
| - - -■ - - - | TEMIR_MO_off    | TEMIR_MO_off | 98.6  | 156 | -2.94 |
| - - -★ - - - | TEMIR_MO_on     |              |       |     |       |

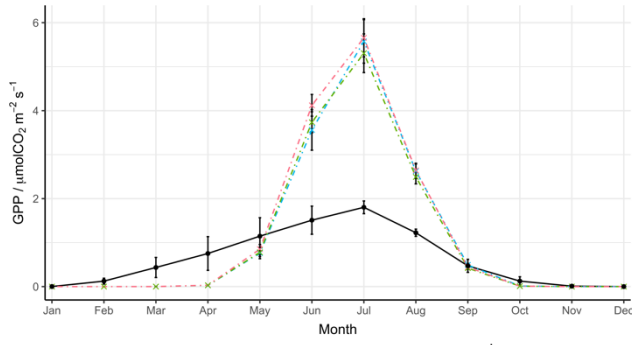

Site: RU-Sam  
PFT of Site: GRA  
Year Range: 2009 – 2013

| GPP Output   |                 | $R^2$ / %    | B / % | N    |        |
|--------------|-----------------|--------------|-------|------|--------|
| —●—          | GPP_DT_VUT_MEAN | TEMIR_FLUX   | 78.2  | 71.7 | -0.382 |
| - - -▲ - - - | TEMIR_FLUX      | TEMIR_MO_on  | 79.2  | 80.9 | -0.471 |
| - - -■ - - - | TEMIR_MO_off    | TEMIR_MO_off | 79    | 68   | -0.35  |
| - - -★ - - - | TEMIR_MO_on     |              |       |      |        |

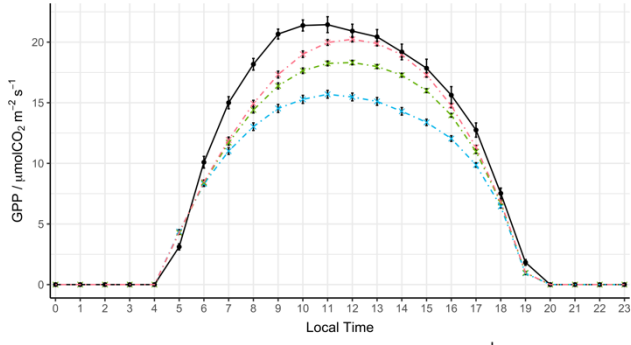

Site: US-Me2  
PFT of Site: ENF  
Time Period: July of 2012

| GPP Output   |                 | $R^2$ / %    | B / % | N     |       |
|--------------|-----------------|--------------|-------|-------|-------|
| —●—          | GPP_DT_VUT_MEAN | TEMIR_FLUX   | 99.3  | -24.9 | 0.708 |
| - - -▲ - - - | TEMIR_FLUX      | TEMIR_MO_on  | 98.9  | -8.75 | 0.89  |
| - - -■ - - - | TEMIR_MO_off    | TEMIR_MO_off | 99.3  | -14.5 | 0.826 |
| - - -★ - - - | TEMIR_MO_on     |              |       |       |       |

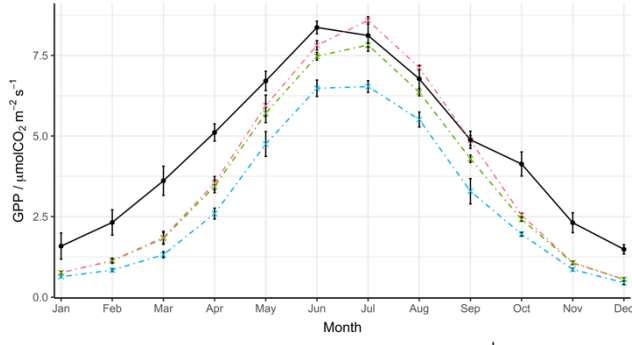

Site: US-Me2  
PFT of Site: ENF  
Year Range: 2009 – 2013

| GPP Output   |                 | $R^2$ / %    | B / % | N     |       |
|--------------|-----------------|--------------|-------|-------|-------|
| —●—          | GPP_DT_VUT_MEAN | TEMIR_FLUX   | 96.1  | -36.4 | 0.176 |
| - - -▲ - - - | TEMIR_FLUX      | TEMIR_MO_on  | 95.7  | -17.4 | 0.541 |
| - - -■ - - - | TEMIR_MO_off    | TEMIR_MO_off | 97.1  | -22.7 | 0.487 |
| - - -★ - - - | TEMIR_MO_on     |              |       |       |       |

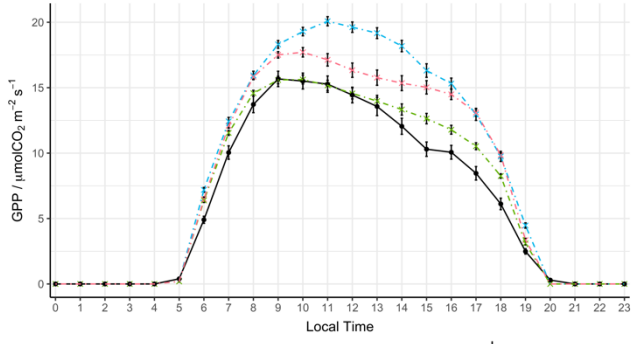

Site: US-MMS  
PFT of Site: DBF  
Time Period: July of 2012

| GPP Output   |                 | $R^2$ / %    | B / % | N    |       |
|--------------|-----------------|--------------|-------|------|-------|
| —●—          | GPP_DT_VUT_MEAN | TEMIR_FLUX   | 97.7  | 36.5 | 0.587 |
| - - -▲ - - - | TEMIR_FLUX      | TEMIR_MO_on  | 97.5  | 24.1 | 0.725 |
| - - -■ - - - | TEMIR_MO_off    | TEMIR_MO_off | 98.5  | 9.12 | 0.889 |
| - - -★ - - - | TEMIR_MO_on     |              |       |      |       |

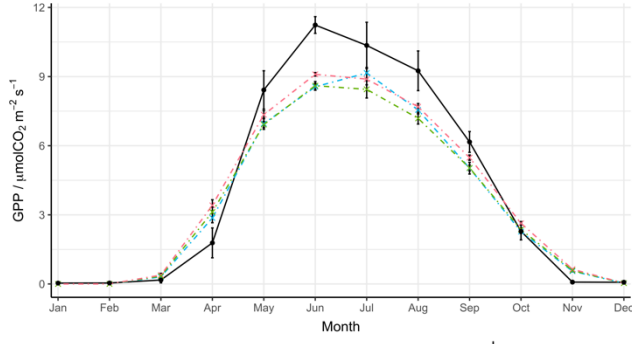

Site: US-MMS  
PFT of Site: DBF  
Year Range: 2009 – 2013

| GPP Output   |                 | $R^2$ / %    | B / % | N     |       |
|--------------|-----------------|--------------|-------|-------|-------|
| —●—          | GPP_DT_VUT_MEAN | TEMIR_FLUX   | 98.2  | -13.2 | 0.797 |
| - - -▲ - - - | TEMIR_FLUX      | TEMIR_MO_on  | 97.7  | -8.58 | 0.801 |
| - - -■ - - - | TEMIR_MO_off    | TEMIR_MO_off | 98    | -14.6 | 0.788 |
| - - -★ - - - | TEMIR_MO_on     |              |       |       |       |

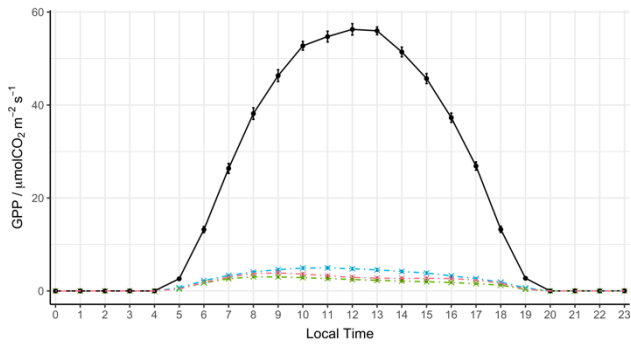

Site: US-Ne1  
PFT of Site: CRO  
Time Period: July of 2012

| GPP Output |                 | $R^2$ / % | B / % | N      |
|------------|-----------------|-----------|-------|--------|
| —●—        | GPP_DT_VUT_MEAN |           |       |        |
| -x-        | TEMIR_FLUX      | 96.3      | -90.3 | 0.0607 |
| -x-        | TEMIR_MO_on     | 86.1      | -92.8 | 0.0353 |
| -x-        | TEMIR_MO_off    | 84.3      | -94.2 | 0.0201 |

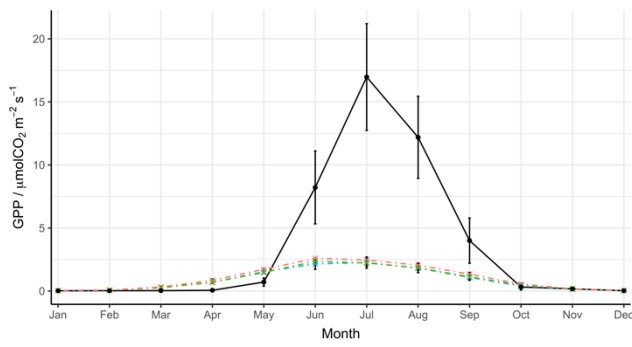

Site: US-Ne1  
PFT of Site: CRO  
Year Range: 2009 - 2013

| GPP Output |                 | $R^2$ / % | B / % | N     |
|------------|-----------------|-----------|-------|-------|
| —●—        | GPP_DT_VUT_MEAN |           |       |       |
| -x-        | TEMIR_FLUX      | 72        | -75.5 | 0.338 |
| -x-        | TEMIR_MO_on     | 68.5      | -71.4 | 0.349 |
| -x-        | TEMIR_MO_off    | 70.8      | -74.9 | 0.343 |

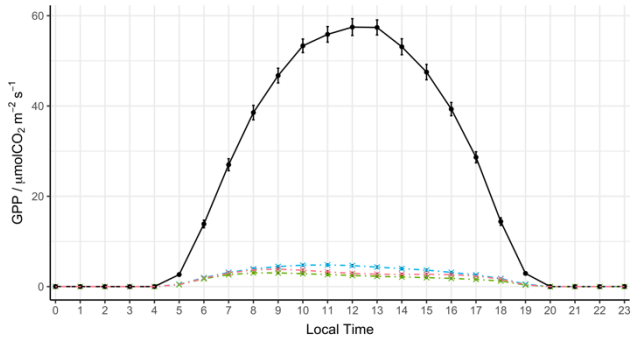

Site: US-Ne2  
PFT of Site: CRO  
Time Period: July of 2012

| GPP Output |                 | $R^2$ / % | B / % | N      |
|------------|-----------------|-----------|-------|--------|
| —●—        | GPP_DT_VUT_MEAN |           |       |        |
| -x-        | TEMIR_FLUX      | 96.6      | -91.1 | 0.0489 |
| -x-        | TEMIR_MO_on     | 86        | -93   | 0.029  |
| -x-        | TEMIR_MO_off    | 84        | -94.4 | 0.0141 |

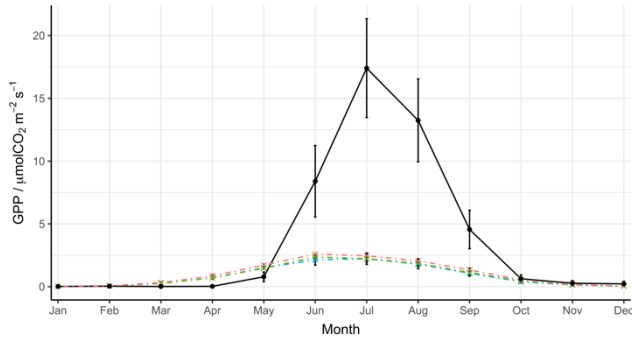

Site: US-Ne2  
PFT of Site: CRO  
Year Range: 2009 - 2013

| GPP Output |                 | $R^2$ / % | B / % | N     |
|------------|-----------------|-----------|-------|-------|
| —●—        | GPP_DT_VUT_MEAN |           |       |       |
| -x-        | TEMIR_FLUX      | 71.4      | -77.3 | 0.32  |
| -x-        | TEMIR_MO_on     | 68.1      | -73.2 | 0.337 |
| -x-        | TEMIR_MO_off    | 70.3      | -76.5 | 0.328 |

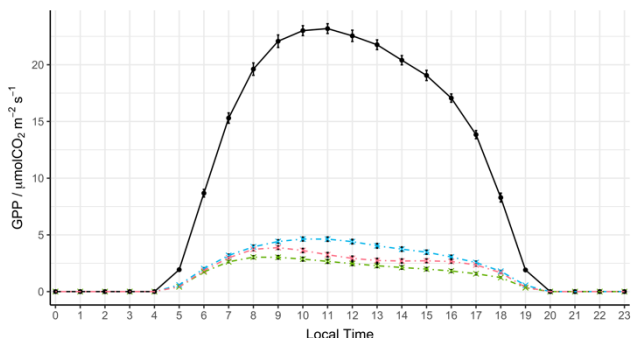

Site: US-Ne3  
PFT of Site: CRO  
Time Period: July of 2012

| GPP Output |                 | $R^2$ / % | B / % | N      |
|------------|-----------------|-----------|-------|--------|
| —●—        | GPP_DT_VUT_MEAN |           |       |        |
| -x-        | TEMIR_FLUX      | 99.3      | -80.3 | 0.117  |
| -x-        | TEMIR_MO_on     | 95.1      | -84.1 | 0.0744 |
| -x-        | TEMIR_MO_off    | 93.4      | -87.3 | 0.0391 |

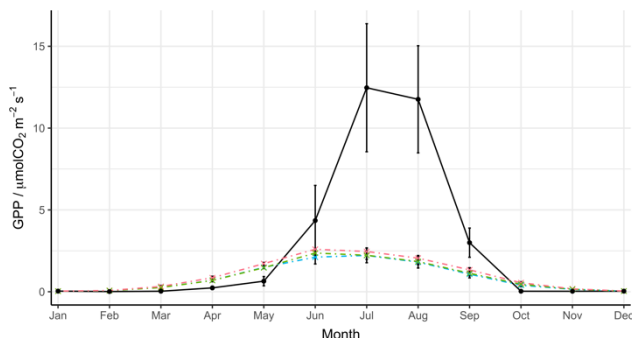

Site: US-Ne3  
PFT of Site: CRO  
Year Range: 2009 - 2013

| GPP Output |                 | $R^2$ / % | B / % | N     |
|------------|-----------------|-----------|-------|-------|
| —●—        | GPP_DT_VUT_MEAN |           |       |       |
| -x-        | TEMIR_FLUX      | 64.4      | -68.3 | 0.361 |
| -x-        | TEMIR_MO_on     | 59.8      | -62.6 | 0.375 |
| -x-        | TEMIR_MO_off    | 61.6      | -67.1 | 0.369 |

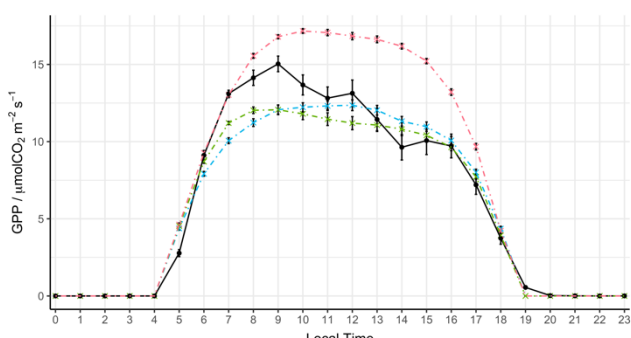

Site: US-NR1  
PFT of Site: ENF  
Time Period: July of 2012

| GPP Output |                 | $R^2$ / % | B / % | N     |
|------------|-----------------|-----------|-------|-------|
| —●—        | GPP_DT_VUT_MEAN |           |       |       |
| -x-        | TEMIR_FLUX      | 95.8      | -4.7  | 0.848 |
| -x-        | TEMIR_MO_on     | 95.5      | 26.9  | 0.692 |
| -x-        | TEMIR_MO_off    | 97.4      | -6.58 | 0.867 |

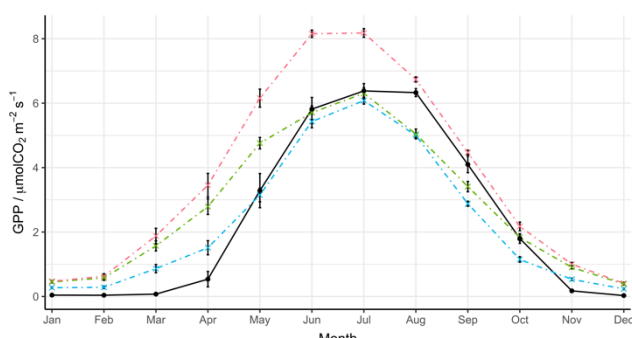

Site: US-NR1  
PFT of Site: ENF  
Year Range: 2009 - 2013

| GPP Output |                 | $R^2$ / % | B / % | N     |
|------------|-----------------|-----------|-------|-------|
| —●—        | GPP_DT_VUT_MEAN |           |       |       |
| -x-        | TEMIR_FLUX      | 95.1      | -4.23 | 0.756 |
| -x-        | TEMIR_MO_on     | 88.8      | 52.8  | 0.46  |
| -x-        | TEMIR_MO_off    | 87.7      | 17.9  | 0.662 |

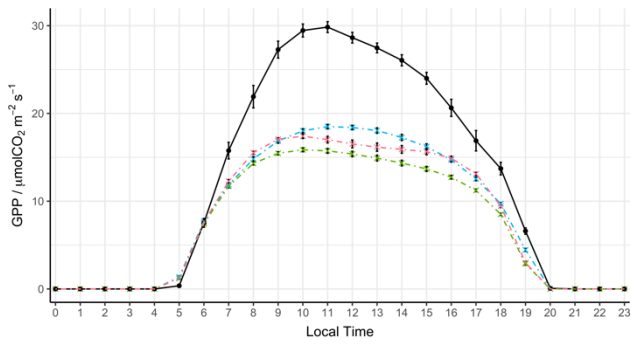

Site: US-Oho  
PFT of Site: DBF  
Time Period: July of 2012

| GPP Output      |              | $R^2$ / % | B / % | N     |
|-----------------|--------------|-----------|-------|-------|
| GPP_DT_VUT_MEAN | TEMIR_FLUX   | 98.8      | -32.3 | 0.633 |
|                 | TEMIR_MO_on  | 97.3      | -34.9 | 0.606 |
|                 | TEMIR_MO_off | 97.4      | -40.8 | 0.541 |

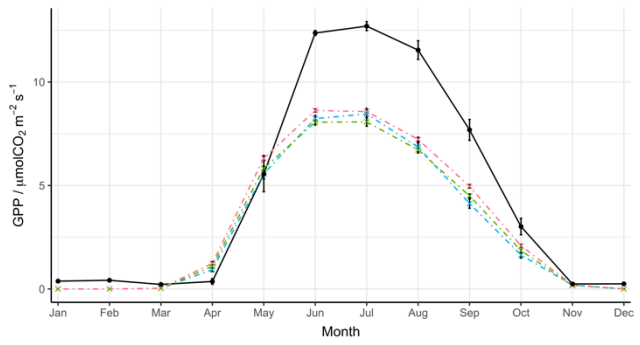

Site: US-Oho  
PFT of Site: DBF  
Year Range: 2009 - 2013

| GPP Output      |              | $R^2$ / % | B / % | N     |
|-----------------|--------------|-----------|-------|-------|
| GPP_DT_VUT_MEAN | TEMIR_FLUX   | 95.5      | -34.2 | 0.633 |
|                 | TEMIR_MO_on  | 94.5      | -28.3 | 0.653 |
|                 | TEMIR_MO_off | 94.7      | -33.6 | 0.623 |

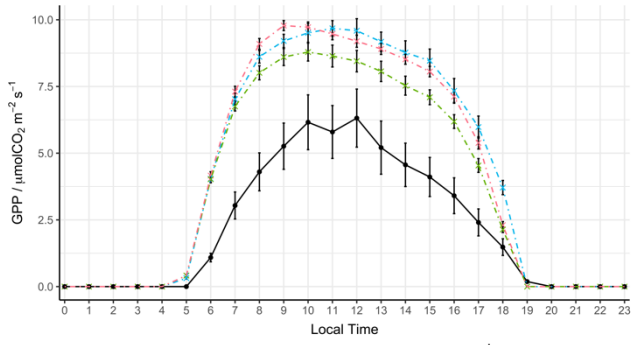

Site: US-SRG  
PFT of Site: GRA  
Time Period: July of 2012

| GPP Output      |              | $R^2$ / % | B / % | N      |
|-----------------|--------------|-----------|-------|--------|
| GPP_DT_VUT_MEAN | TEMIR_FLUX   | 95.5      | 90.2  | 0.0722 |
|                 | TEMIR_MO_on  | 95.3      | 86.5  | 0.11   |
|                 | TEMIR_MO_off | 95.5      | 67.4  | 0.305  |

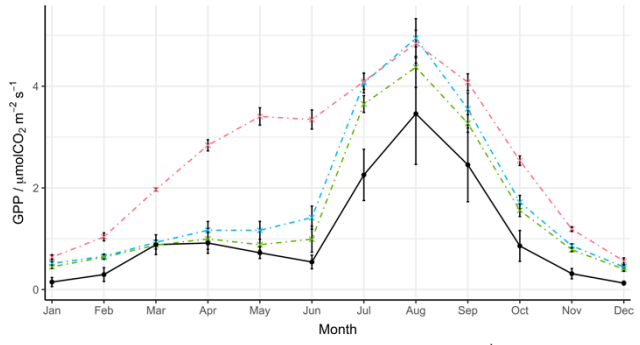

Site: US-SRG  
PFT of Site: GRA  
Year Range: 2009 - 2013

| GPP Output      |              | $R^2$ / % | B / % | N      |
|-----------------|--------------|-----------|-------|--------|
| GPP_DT_VUT_MEAN | TEMIR_FLUX   | 95.3      | 65.2  | 0.141  |
|                 | TEMIR_MO_on  | 73        | 135   | -0.783 |
|                 | TEMIR_MO_off | 95.7      | 45.4  | 0.4    |

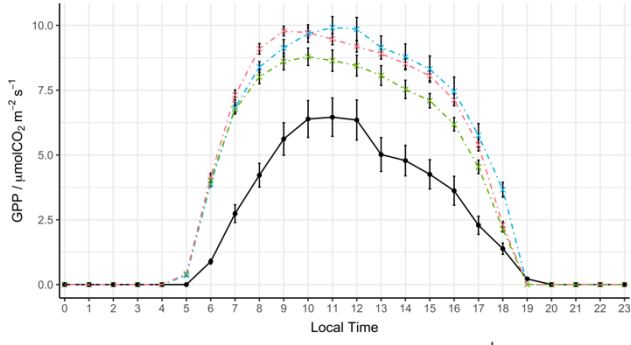

Site: US-SRM  
PFT of Site: GRA  
Time Period: July of 2012

| GPP Output      |              | $R^2$ / % | B / % | N     |
|-----------------|--------------|-----------|-------|-------|
| GPP_DT_VUT_MEAN | TEMIR_FLUX   | 94.9      | 86.5  | 0.119 |
|                 | TEMIR_MO_on  | 93.8      | 83.3  | 0.151 |
|                 | TEMIR_MO_off | 93.8      | 64.5  | 0.34  |

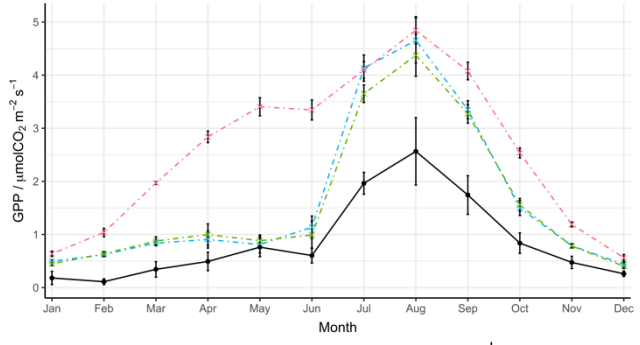

Site: US-SRM  
PFT of Site: GRA  
Year Range: 2009 - 2013

| GPP Output      |              | $R^2$ / % | B / % | N      |
|-----------------|--------------|-----------|-------|--------|
| GPP_DT_VUT_MEAN | TEMIR_FLUX   | 96.5      | 90.3  | -0.265 |
|                 | TEMIR_MO_on  | 74.7      | 195   | -1.74  |
|                 | TEMIR_MO_off | 97.3      | 82.6  | -0.157 |



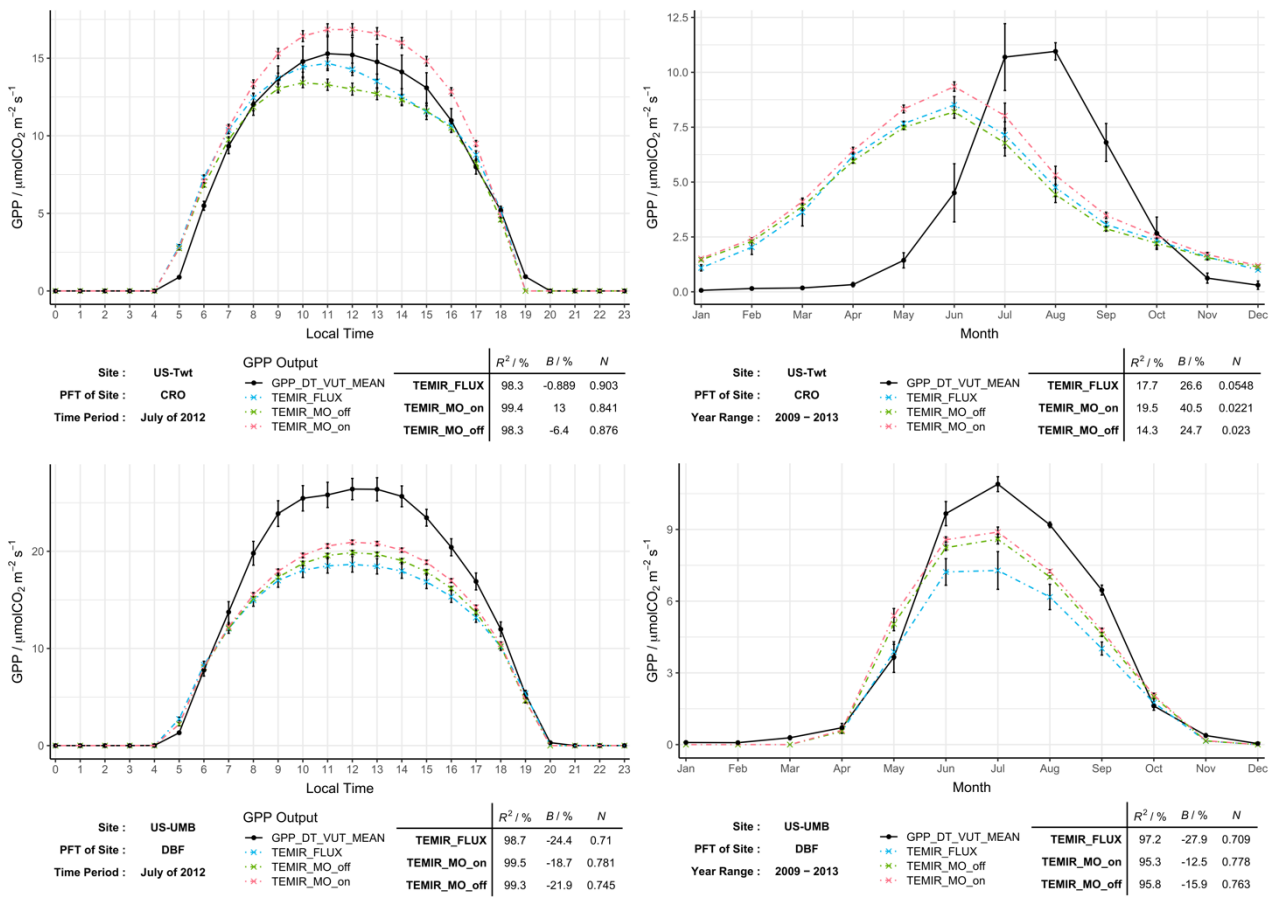

Figure S1: Diurnal and monthly averaged gross primary productivity of sites listed in Table S3 from simulations described in Table 1 with relevant site information and statistics.

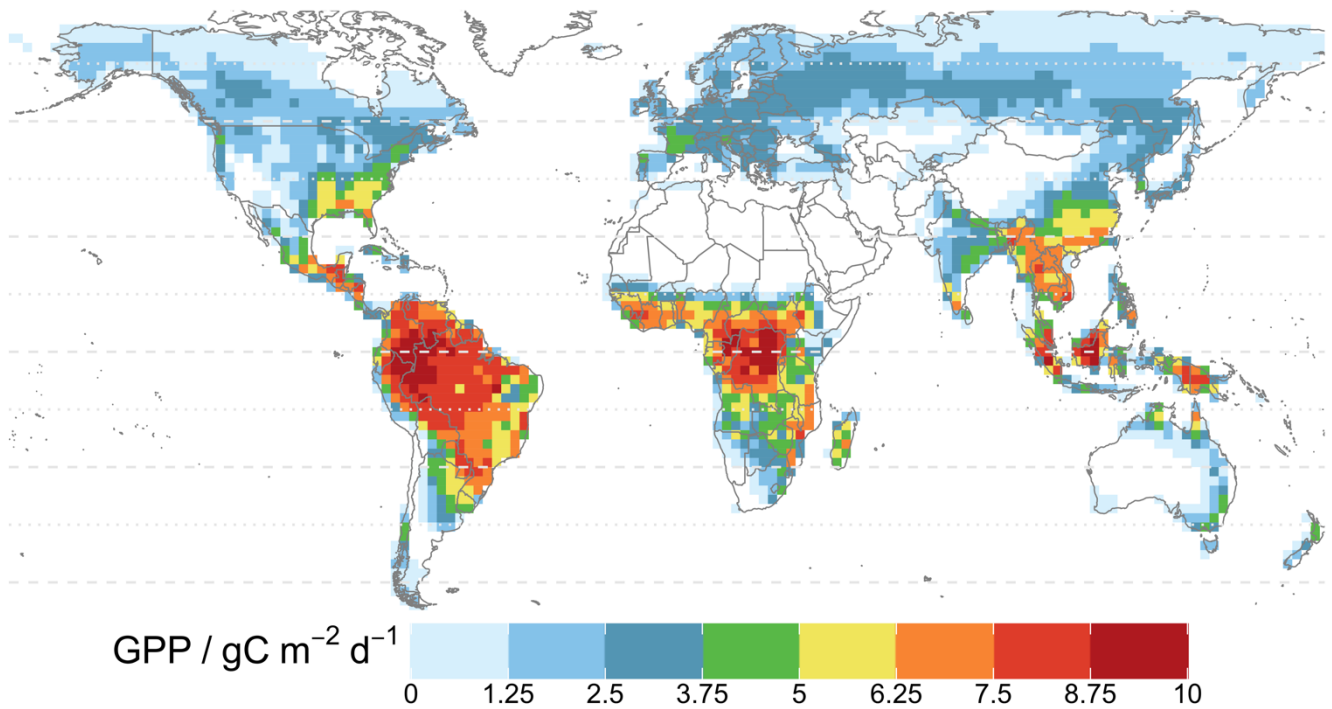

Figure S2: Simulated global GPP averaged over years 2010 to 2015 from simulation TEMIR\_MO\_off (Table 2)

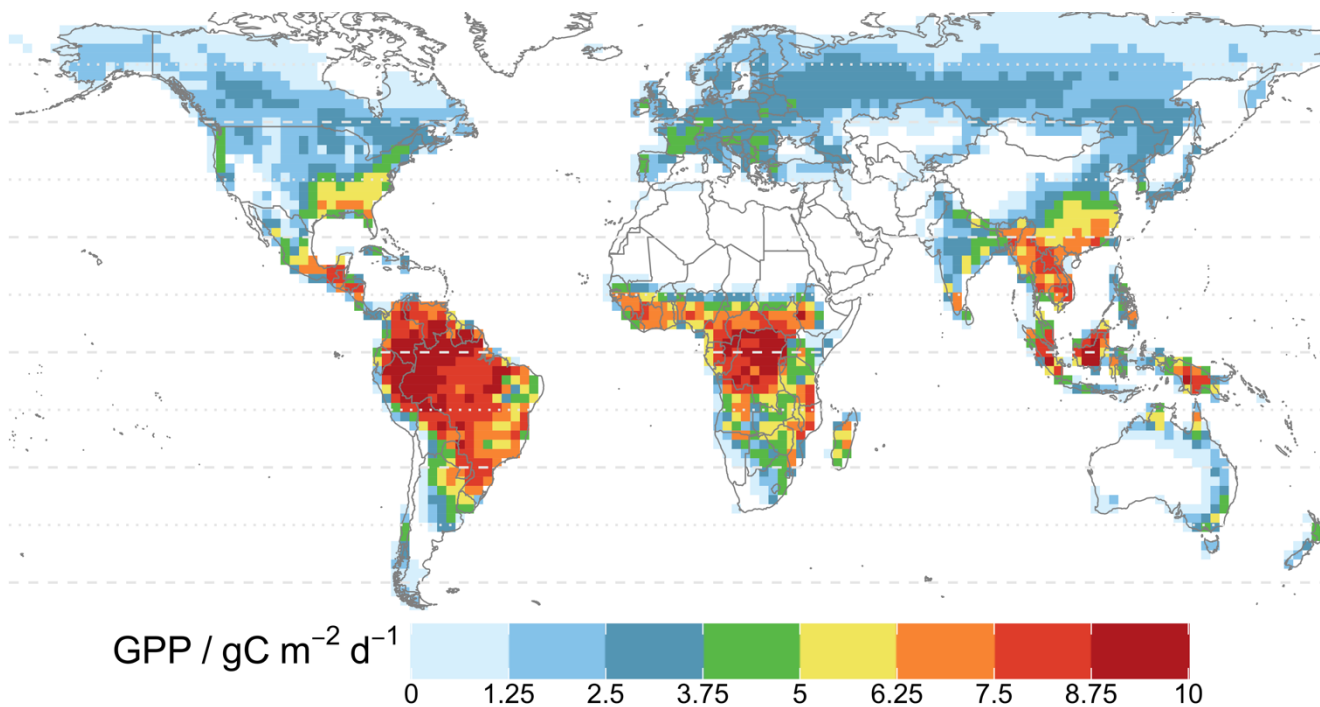

Figure S3: Simulated global GPP averaged over years 2010 to 2015 from simulation TEMIR\_MO\_on (Table 2)

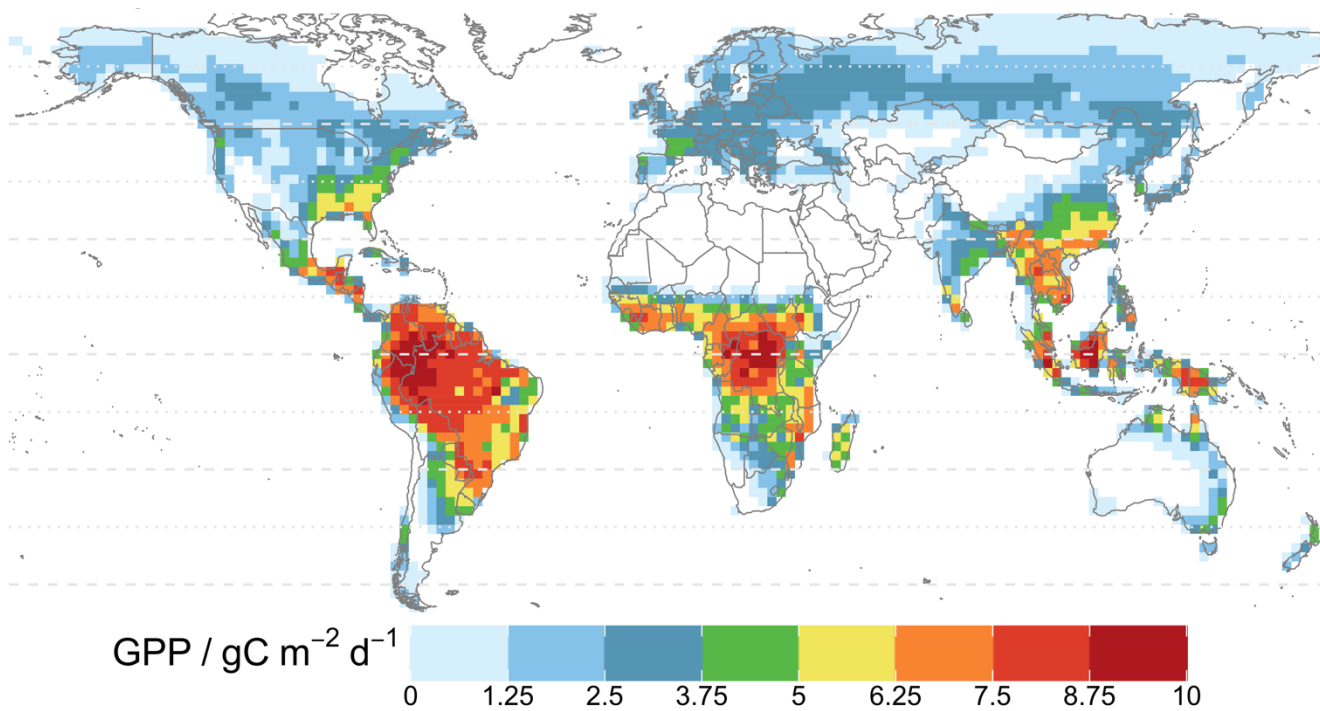

Figure S4: Simulated global GPP averaged over years 2010 to 2015 from simulation TEMIR\_S1 (Table 2)

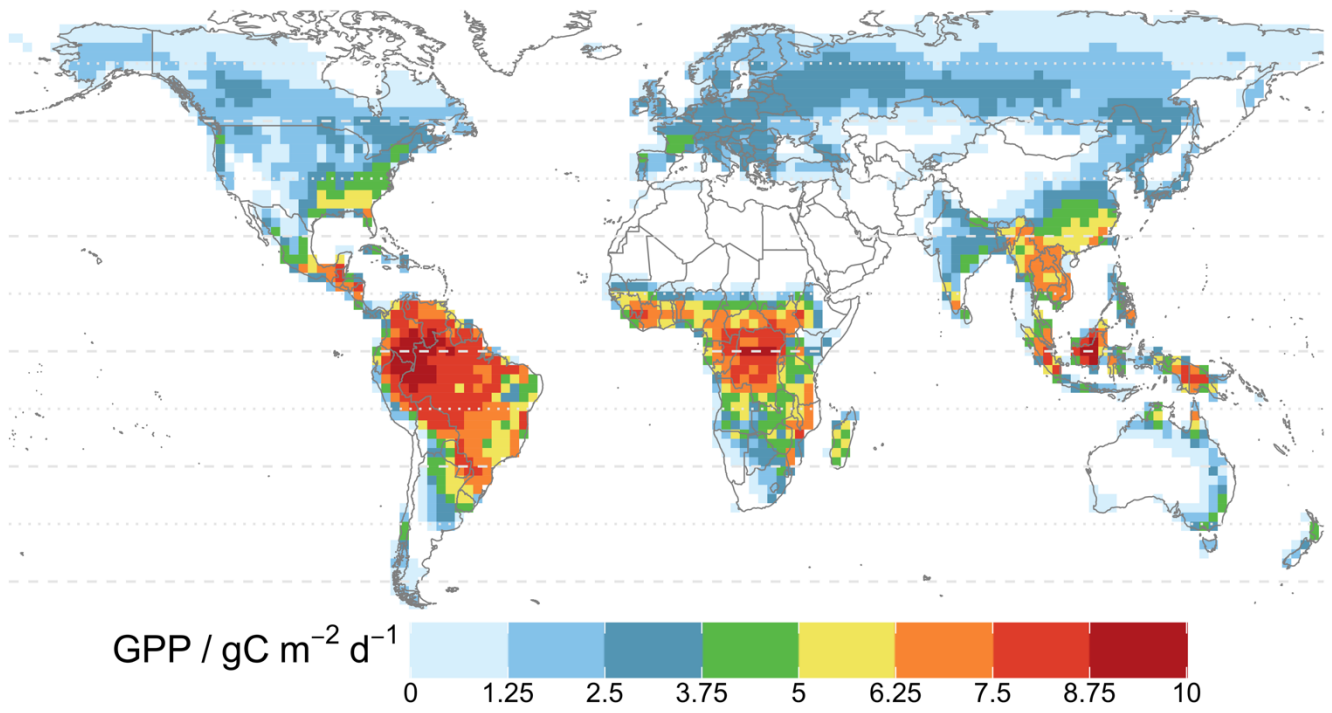

Figure S5: Simulated global GPP averaged over years 2010 to 2015 from simulation TEMIR\_Sh (Table 2)
